## 1                    **SARS-CoV-2 activates ER stress and Unfolded protein response**

2    Livia Rosa-Fernandes<sup>1,2#</sup>, Lucas C. Lazari<sup>1#</sup>, Janaina Macedo da Silva<sup>1#</sup>, Vinicius  
3    de Moraes Gomes<sup>1</sup>, Rafael Rahal Guaragna Machado<sup>3</sup>, Ancely Ferreira dos  
4    Santos<sup>4</sup>, Danielle Bastos Araujo<sup>3</sup>, João Vitor Paccini Coutinho<sup>1</sup>, Gabriel Santos  
5    Arini<sup>4</sup>, Claudia B. Angeli<sup>1</sup>, Edmarcia E. de Souza<sup>5</sup>, Carsten Wrenger<sup>5</sup>, Claudio R.  
6    F. Marinho<sup>2</sup>, Danielle B. L. Oliveira<sup>3</sup>, Edison L. Durigon<sup>3,6</sup>, Leticia Labriola<sup>4</sup>,  
7    Giuseppe Palmisano<sup>1\*</sup>

8    1. GlycoProteomics Laboratory, Department of Parasitology, ICB, University of São Paulo, Brazil  
9

10    2. Laboratory of Experimental Immunoparasitology, Department of Parasitology,  
11    ICB, University of São Paulo, Brazil

12    3. Laboratory of Clinical and Molecular Virology, Department of Microbiology,  
13    ICB, University of São Paulo, Brazil

14    4. Department of Biochemistry, Institute of Chemistry, University of São Paulo,  
15    Brazil

16    5. Unit for Drug Discovery, Department of Parasitology, ICB, University of São  
17    Paulo, Brazil

18    6. Scientific Platform Pasteur USP, Sao Paulo, Brazil

19

20    # These authors share first authorship

21    \* To whom correspondence should be addressed: Prof. Giuseppe Palmisano,  
22    Glycoproteomics Laboratory, Department of Parasitology, ICB, University of São  
23    Paulo, Brazil, Av. Prof. Lineu Prestes, 1374, 05508-900 - São Paulo – SP – Brazil,  
24    Tel: + 55-11-99920-8662, palmisano.gp@gmail.com, palmisano.gp@usp.br

25

## 26    **ABSTRACT**

27    Coronavirus disease-2019 (COVID-19) pandemic caused by the SARS-CoV-2  
28    coronavirus infection is a major global public health concern affecting millions of  
29    people worldwide. The scientific community has joint efforts to provide effective  
30    and rapid solutions to this disease. Knowing the molecular, transmission and

31 clinical features of this disease is of paramount importance to develop effective  
32 therapeutic and diagnostic tools. Here, we provide evidence that SARS-CoV-2  
33 hijacks the glycosylation biosynthetic, ER-stress and UPR machineries for viral  
34 replication using a time-resolved (0-48 hours post infection, hpi) total, membrane  
35 as well as glycoproteome mapping and orthogonal validation. We found that  
36 SARS-CoV-2 induces ER stress and UPR is observed in Vero and Calu-3 cell lines  
37 with activation of the PERK-eIF2 $\alpha$ -ATF4-CHOP signaling pathway. ER-associated  
38 protein upregulation was detected in lung biopsies of COVID-19 patients and  
39 associated with survival. At later time points, cell death mechanisms are triggered.  
40 The data show that ER stress and UPR pathways are required for SARS-CoV-2  
41 infection, therefore representing a potential target to develop/implement anti-  
42 COVID-19 drugs.

43 **Keywords:** Coronavirus, ER stress, Unfolded protein response, SARS-CoV-2,  
44 COVID-19, proteomics, Vero CCL-81, CALU-3

## 45 INTRODUCTION

46 Coronavirus Disease 19 (COVID-19) is caused by severe acute respiratory  
47 syndrome coronavirus 2 (SARS-CoV-2) <sup>1</sup>, an enveloped RNA virus belonging to  
48 the family *Coronaviridae* in the subfamily *Orthocoronavirinae* <sup>2</sup>. Common  
49 symptoms of human infection are dry cough, sore throat and fever; however, a  
50 percentage of the patients can develop organ failure, septic shock,  
51 pulmonary edemas, severe pneumonia and Acute Respiratory Distress  
52 Syndrome, complications that can be fatal <sup>3</sup>. Considering the fast increase in the  
53 infection numbers and the outbreaks of SARS-CoV-2 in other countries, on 30<sup>th</sup>  
54 January of 2020 the World Health Organization (WHO) declared COVID-19 to be  
55 a Public Health Emergency of International Concern and warned that countries  
56 with vulnerable health care systems would be at high risk <sup>3</sup>.

57 Understanding host-pathogen interactions and the host response to viral  
58 infection are important to develop new strategies to treat, prevent and diagnose  
59 COVID-19 <sup>4</sup>. The host-pathogen dynamics is the key to infection control and  
60 minimize spread, incidence, prevalence and mortality <sup>5-8</sup>. In the host cell, viral

61 proteins are processed through the endoplasmic reticulum (ER) and Golgi  
62 apparatus shaping the glycosylation level (especially N-linked glycans) of each  
63 site and regulating their folding<sup>9</sup>. This post-translational modification is often used  
64 by viruses to evade immune recognition, to increase receptor binding, infectivity,  
65 viral release, virulence and to increase viral replication<sup>10-12</sup>. Therefore,  
66 glycosylation process is the subject of numerous studies and often used as  
67 therapeutic target to treat viral infections<sup>13</sup>. One strategy is to target the host  
68 glycosylation machinery to pharmacologically disrupt viral glycoproteins folding,  
69 being the inhibitors of N-linked glycosylation one of the most tested agents for  
70 antiviral use<sup>14</sup>. In particular, recent reports have shown that not only the targeting  
71 of host machinery but a direct modification in glycosylation levels of viral  
72 glycoproteins could impair viral infection/replication of SARS-Cov-2, thus  
73 indicating that targeting this process is a promising strategy to reduce SARS-  
74 CoV-2 infection.

75 Viral infections typically lead to an increase in protein synthesis that can  
76 overwhelm the ER folding capacity, which may result in unfolded protein  
77 accumulation resulting in ER stress<sup>15</sup>. To reduce this type of stress, the cell  
78 activates signaling pathways known as unfolded protein response (UPR), that  
79 reduces the overall protein synthesis, increases ER's folding capacity and targets  
80 misfolded proteins to proteasome degradation<sup>16</sup>. UPR consists of three signaling  
81 pathways activated by the transmembrane protein sensors IRE1, PERK and ATF6.

82 Briefly, IRE1 branch activation causes the mRNA splicing of a potent  
83 transcription factor, XBP1, which induces the expression of genes that will act in  
84 ER stress response. The first step in the PERK branch activation includes the  
85 increase on its phosphorylation state, which promotes the release of ER  
86 chaperone BiP as well as the phosphorylation of the transcriptional factor eIF2 $\alpha$ ,  
87 which will then upregulate ATF4 expression. This signaling pathway culminates  
88 with protein synthesis attenuation and selective induction of translation of ER  
89 chaperones and UPR-related transcriptional factors. Finally, the accumulation of  
90 unfolded proteins causes ATF6 release from the ER membrane allowing its traffic  
91 to the Golgi apparatus, where it will be activated by cleavage and consequently

92 lead to upregulation of genes encoding for ER chaperones and components  
93 necessary for degradation of unfolded proteins <sup>17</sup>.

94 Recognizing the biomolecular features that facilitate infection and which  
95 host-mediated mechanisms the pathogen uses to favor its replication and  
96 transmission are substantial to achieve disease control and prevention<sup>18</sup>.  
97 Quantifying and analyzing the temporal changes in host and viral proteins over  
98 the biological processes of infection could provide valuable information about the  
99 virus-host interplay <sup>19</sup>. Here we applied a temporal and spatial proteome analysis  
100 combined with assessment of N-deglycoproteome to depict the host response to  
101 SARS-CoV-2 infection. We demonstrated that SARS-CoV-2 induces ER stress  
102 response, UPR and modulation of glycosylation machinery in the host cell. ER-  
103 associated transcripts upregulation was also detected in lung biopsies of COVID-  
104 19 patients and associated with higher survival. We also show that sustained  
105 infection prolonged the effects of ER-stress and UPR, leading to cell death related  
106 to necroptosis and caspase induced apoptosis pathways.

## 107 **MATERIALS AND METHODS**

### 108 **Cell lines, SARS-CoV-2 and infection assays**

109 Vero cell line (ATCC CCL-81) were maintained in DMEM medium supplemented  
110 with 10% (v/v) FBS, 4.5 g/L glucose, 2 mM L-glutamine, 1 mM sodium pyruvate,  
111 100 U/mL penicillin-streptomycin and 1.5 g/L NaHCO<sub>3</sub> at 37°C with 5% CO<sub>2</sub>.  
112 Calu-3 cells (ATCC HTB-55) were maintained in DMEM medium supplemented  
113 with 20% (v/v) FBS, 1% (v/v) nonessential amino acids, 4.5 g/L glucose, 2 mM L-  
114 glutamine, 1 mM sodium pyruvate, 100 U/mL penicillin-streptomycin and 1.5 g/L  
115 NaHCO<sub>3</sub> at 37 °C with 5% CO<sub>2</sub>.

116 SARS-CoV-2 isolate (HIAE-02: SARS-CoV-2/SP02/human/2020/BRA (GenBank  
117 accession number MT126808) <sup>20</sup> was used to infect Vero CCL-81 and Calu-3 cells  
118 with multiplicity of infection (MOI) of 0.02. Following adsorption in DMEM with  
119 2.5% FBS for 1h, fresh medium was added, and cells were further incubated at  
120 37 °C and 5% CO<sub>2</sub> for different time points (2, 6, 12, 24 and 48h). After the  
121 designated incubation time, cell lysates were retrieved in 1% sodium

122 deoxycholate (SDC) in phosphate buffered saline solution with Protease Inhibitor  
123 Cocktail (cOmplete, Roche) buffer, 0.1M Na<sub>2</sub>CO<sub>3</sub> with Protease Inhibitor Cocktail  
124 (cOmplete, Roche) buffer or 8M Urea with Protease Inhibitor Cocktail (cOmplete,  
125 Roche) buffer, according to the follow-up application. Aliquots of cells and  
126 supernatants were collected at the different time points for virus RNA copy  
127 number quantification by reverse transcription-quantitative polymerase chain  
128 reaction (RT-qPCR), targeting the E gene <sup>21</sup>. The assay was reproduced in two  
129 independent experiments and expressed by standard error of the mean (SEM).  
130 Graphics and SEM were done using GraphPad Prism software version 8.1  
131 (GraphPad Software, San Diego, USA).

132 All assays were conducted in triplicates in a BSL-3 facility at the Institute of  
133 Biomedical Sciences, University of Sao Paulo, under the Laboratory biosafety  
134 guidance related to coronavirus disease (COVID-19): Interim guidance, 28  
135 January 2021 (<https://www.who.int/publications/i/item/WHO-WPE-GIH-2021.1>).

#### 136 **Total proteome analysis (cell lysis and trypsin digestion)**

137 SARS-CoV-2-infected and mock-infected control cells were lysed in 1% sodium  
138 deoxycholate (SDC), 1× PBS and 1× protease inhibitor cocktail (Sigma-Aldrich)  
139 and probe tip sonicated for three cycles for 20 s and intervals of 30 s on ice <sup>22</sup>.  
140 Proteins were reduced with 10 mM DTT for 30 min at 56 °C and alkylated with 40  
141 mM IAA for 40 min at room temperature, in the dark. Proteins were quantified  
142 using NanoDrop 2000 spectrophotometer (Thermo Scientific) before sequencing  
143 grade porcine trypsin (Promega) was added to a 1:50 ratio. The digestion, which  
144 proceeded for 16 h at 37 °C, was blocked by adding TFA 1% (v/v) final  
145 concentration before the SDC was removed from the solution by centrifugation  
146 at 10000 x g for 10 min <sup>22</sup>. Tryptic peptides were desalted using reversed phase  
147 C18 microcolumns before LC-MS/MS analysis.

#### 148 **Microsomal membrane proteome analysis (cell lysis and trypsin digestion)**

149 Microsomal membrane protein fraction was isolated as previously described <sup>23,24</sup>.  
150 Briefly, cells were lysed in 100 mM Na<sub>2</sub>CO<sub>3</sub>, pH 11 containing protease inhibitors  
151 cocktail (Sigma-Aldrich) by sonication using three rounds of probe-tip sonication

152 at 40% output for 20 s with 30 s resting on ice. The lysates were incubated at 4°C  
153 with gentle rotation for 1.5 h followed by ultracentrifugation at 100000 x g for 1.5  
154 h. After ultracentrifugation, the pellets were recovered and washed with 100mM  
155 triethylammonium bicarbonate (TEAB) and re-dissolved in 8 M urea in 50mM  
156 TEAB. Protein concentration determination was performed using Qubit  
157 fluorescent assay (Invitrogen). The solubilized membrane pellets were reduced  
158 and alkylated as described above. Urea was diluted to 0.8 M with 50mM TEAB  
159 and proteins were digested with trypsin at an enzyme to substrate ratio of 1:50  
160 for 16 h at room temperature. Tryptic peptides were purified using Oligo R3  
161 reversed phase SPE micro-column <sup>25</sup>.

### 162 **Glycopeptide enrichment and PNGase F deglycosylation**

163 Tryptic glycopeptides obtained from microsomal membrane proteins were  
164 enriched using HILIC SPE as previously described <sup>26,27</sup>. Briefly, dried peptides  
165 were reconstituted in 100 µL loading and washing buffer containing ACN 80%  
166 (v/v) in TFA 1% (v/v). Peptides were loaded onto a primed custom-made HILIC  
167 SPE micro-column packed with PolyHYDROXYETHYL A™ resin (PolyLC Inc). The  
168 HILIC SPE columns were then washed in 100 µL loading and washing buffer. The  
169 enriched glycopeptides were eluted with TFA 1% (v/v) followed by 25 mM  
170 NH<sub>4</sub>HCO<sub>3</sub> and finally ACN 50% (v/v). The three eluted fractions were then  
171 combined, dried by vacuum centrifugation and purified on a primed Oligo R3  
172 reversed phase SPE micro-column. The enriched glycopeptides were  
173 resuspended in 50 mM Ambic, pH 7.5 and de-N-glycosylated using 500 U N-  
174 glycosidase F (PNGase F, New England Biolabs) for 12 h at 37°C. After incubation,  
175 the de-N-glycosylated were purified on a primed Oligo R3 reversed phase SPE  
176 micro-column, before LC-MS/MS analysis.

### 177 **LC-MS/MS proteomics analysis**

178 Tryptic peptides were analyzed by nanoflow LC-MS/MS analysis. The nLC-  
179 MS/MS analysis was performed using an Easy nano LC1000 (Thermo) HPLC  
180 coupled with an LTQ Orbitrap Velos (Thermo). Peptides were loaded on a C18  
181 EASY-column (2cm x 5 µm x 100 µm; 120 Å pore, Thermo) using a 300 nL/min

182 flow rate of mobile phase A (0.1% formic acid) and separated in a C18 PicoFrit  
183 PepMap (10 cm x 10  $\mu$ m x 75  $\mu$ m; 135 Å pore, New Objective), over 105 minutes  
184 using a linear gradient 2-30 % followed by 20 min of 30-45% of mobile phase B  
185 (100% ACN; 0,1% formic acid). The eluted peptides were ionized using  
186 electrospray. The top 20 most intense precursor ions with charge-state  $\geq 2$  were  
187 fragmented using CID at 35 normalized collision energy and 10 ms activation  
188 time. The MS scan range was set between 350-1800 m/z, the MS scan resolution  
189 was 60.000, the MS1 ion count was  $1 \times 10^6$  and the MS2 ion count was  $5 \times 10^4$ .  
190 The mass spectrometry proteomics data have been deposited to the  
191 ProteomeXchange Consortium (<http://proteomecentral.proteomexchange.org>)  
192 via the PRIDE partner repository <sup>28</sup>.

### 193 **Database Search and Statistical Analysis**

194 Raw data were searched using Proteome Discoverer computational platform  
195 v2.3.0.523 (PD) using the Sequest search engine. The parameters used for  
196 database search were *Chlorocebus* (20,699 entries downloaded on 12/2020)  
197 proteome databases supplemented with the UniProt SARS-CoV-2 proteome and  
198 with the common contaminants. Trypsin as cleavage enzyme, two missed  
199 cleavages allowed, carbamidomethylation of cysteine as fixed modification,  
200 oxidation of methionine, and protein N-terminal acetylation as variable  
201 modifications. Asparagine and glutamine deamidation were included as variable  
202 modifications in the de-glycoproteome data. In the Proteome Discoverer platform,  
203 the percolator, peptide, and protein validator nodes were used to calculate PSMs,  
204 peptides, and proteins FDR, respectively. FDR less than 1% was accepted at  
205 protein level. Protein grouping was performed using the strict parsimony  
206 principle. Label-free quantification was performed using the extracted ion  
207 chromatogram area of the precursor ions. Protein quantification normalization  
208 and roll-up were performed using unique and razor peptides and excluding  
209 modified peptides. Differentially regulated proteins between the three conditions  
210 were selected using *t test* with a post-hoc background-based adjusted p-value  
211  $< 0.05$  for multiple hypothesis correction <sup>29</sup>.

### 212 **Bioinformatics analysis**



213 Gene ontology (GO) was performed using the g: profiler tool and GOplot package  
214 <sup>30</sup>, available in Bioconductor. A q-value threshold of 0.05 was used, corrected by  
215 the Benjamini-Hochberg method <sup>31</sup>. Enriched pathways were determined by  
216 Reactome and KEGG platform (q-value < 0.05)<sup>32</sup>; complementary analyses were  
217 performed using the ReactomeFIPlugin app <sup>31</sup>. Protein's subcellular locations  
218 were determined by UniProt release 12.4  
219 (<https://www.uniprot.org/news/2007/10/23/release>). The "Peptides" package <sup>33</sup>  
220 was used to determine the hydropathy score of glycopeptides and the  
221 "mixOmics" package <sup>34</sup> was used to integrate the data for total, membrane, and  
222 deglycoproteome. Complementary analyses were performed using Perseus,  
223 ggplot2 package, Graphpad prism v.8, and RStudio software.

#### 224 **Structural analysis of identified peptides**

225 Structural data for full-length SPIKE protein was retrieved from the CHARMM-GUI  
226 coronavirus repository, based on the model of Wrapp et al <sup>35</sup>, while ORF8 protein  
227 structure was downloaded from PDB <sup>36</sup>. Peptides identified through MS data  
228 analysis were searched in the protein to better visualize their regions using  
229 PyMOL 2.4.1

#### 230 **Western blotting**

231 Cells were lysed in SDC buffer containing protease (Roche, Basel, Switzerland)  
232 and phosphatase (Sigma-Aldrich) inhibitor cocktails. Proteins (10ug of each cell  
233 lysate) were separated by SDS-PAGE and electro transferred onto PVDF  
234 membranes. They were subsequently blocked in a solution containing 5% milk in  
235 PBS-Tween 0.1% (v/v) for 1h at room temperature (RT). Primary antibodies were  
236 diluted in the blocking solution (**Table 1**) and were incubated overnight at 4°C.  
237 Membranes were washed three times in PBS-Tween (0.1%) and then incubated  
238 at RT for 1h with HRP-labeled secondary antibodies, diluted in a solution of 0,1%  
239 BSA in PBS-Tween 0.1% (v/v). Monoclonal anti-alpha-tubulin clone B-5-1-2  
240 antibody (T5168, Sigma-Aldrich) was used as the loading control. For phospho-  
241 protein quantification, the membranes were stripped, blocked and reprobbed using  
242 a solution containing the corresponding anti-fosfospecific antibody. Proteins were



243 visualized by using enhanced chemiluminescence (Millipore Corporation,  
244 Billerica, MA, USA). Images were acquired using Uvitec Image System (Clever  
245 Scientific Limited, Cambridge, UK). Quantitative densitometry was carried out  
246 using the ImageJ software (National Institutes of Health). The volume density of  
247 the chemiluminescent bands was calculated as integrated optical density  $\times$  mm<sup>2</sup>  
248 using ImageJ Fiji. Phosphorylated proteins densitometry values were divided by  
249 the total protein values and the  $\alpha$ -tubulin antibody was used as the normalizer of  
250 the amount of proteins applied in the gel. At least three independent experiments  
251 were performed for each cell type and condition.

252

253 **Table 1:** List of primary antibodies used for protein detection by Western blot.

| <b>Protein</b>               | <b>Company</b>      | <b>Catalog</b> | <b>Dilution</b> |
|------------------------------|---------------------|----------------|-----------------|
| Phospho(S345) MLKL           | Abcam               | ab196436       | 1:1000          |
| MLKL                         | Abcam               | ab184718       | 1:1000          |
| GPX4                         | Abcam               | ab125066       | 1:1000          |
| NRF2                         | Abcam               | ab137550       | 1:1000          |
| Phospho-PERK (Thr980)        | Cell Signaling      | #3179S         | 1:500           |
| PERK                         | Cell Signaling      | #3192          | 1:1000          |
| phospho-eIF2 $\alpha$ (S51)  | Cell Signaling      | #3597S         | 1:1000          |
| eIF2 $\alpha$                | Cell Signaling      | #5324          | 1:1000          |
| ATF4                         | Cell Signaling      | #11815         | 1:1000          |
| phospho-IRE1 $\alpha$ (S724) | Abcam               | ab48187        | 1:1000          |
| IRE1 $\alpha$                | Cell Signaling      | #3294          | 1:1000          |
| XBP1s                        | Cell Signaling      | #12782         | 1:1000          |
| ATF6                         | Abcam               | ab11909        | 1:1000          |
| CHOP                         | Cell Signaling      | #2895          | 1:500           |
| BIP                          | Cell Signaling      | #3183          | 1:1000          |
| Clivead-CASP3 (Asp175)       | Cell Signaling      | #9661L         | 1:500           |
| CASP3                        | Cell Signaling      | #9668S         | 1:500           |
| CASP9                        | Cell Signaling      | #9508S         | 1:1000          |
| Alpha-tubulin clone B-5-1-2  | Sigma-Aldrich       | T5168          | 1:10.000        |
| Anti-rabbit                  | Vector Laboratories | PI1000         | 1:1000          |
| Anti-mouse                   | Vector Laboratories | PI2000         | 1:1000          |

254

## 255 **Statistical analysis**

256 All western blot results were analyzed for Gaussian distribution and passed the  
257 normality test (the number of independent experiments was chosen to present a  
258 normal distribution). The statistical differences between group means were tested

259 by One-way ANOVA followed by Tukey's post-test for multiple comparisons. A  
260 value of  $p < 0.05$  was considered as statistically significant in all analysis. Results  
261 are presented as mean  $\pm$  S.E.M. Each dot represents an independent experiment.

## 262 **RNA-seq data reanalysis**

263 The fastq files were downloaded from the <https://sra-explorer.info/> platform with  
264 the BioProject accession number PRJNA646224<sup>37</sup> and processed on the Galaxy  
265 server<sup>38</sup>. The 'FastQC' module was used to report the quality reads, following by  
266 the trimmed using Trim Galore (v. 0.4.3.1) set to the single-end library. The Trim  
267 Galore output sequences were aligned to the human reference genome hg38  
268 using the HISAT2 (Galaxy Version 2.1.0+galaxy7) platform. A count table was  
269 generated using the htseq-count (Galaxy Version 0.9.1). The differently regulated  
270 genes were analyzed by the limma, Glimma, edgeR, and Homo.sapiens packages  
271 applying a cut-off of  $|\log_2FC| > 1$  and a p-adjusted value  $< 0.05$  (Benjamini-  
272 Hochberg).

## 273 **RESULTS**

274 To identify molecular pathways affected by viral-host interplay on the course of  
275 SARS-CoV-2 infection, a spatio-temporal MS-based quantitative approach  
276 comprised of proteome, membranome and N-deglycoproteome of SARS-CoV-2  
277 infected Vero cells was conducted at 2, 6, 12 and 48 hpi. The membranome refers  
278 to the analysis of microsomal-enriched proteins while the N-deglycoproteome  
279 refers to the analysis of formerly N-linked glycopeptides associated proteins.  
280 Validation of differentially expressed proteins was performed in human epithelial  
281 lung cells (Calu-3) by western blotting and *in silico* transcriptome analysis of lung  
282 biopsies from COVID-19 patients and controls (**Figure 1A**).

283 A total of 1842 proteins were identified and quantified in the proteome analysis  
284 (**Supplementary Data S1**). Eight viral proteins were identified, being three  
285 structural proteins (M, S and N) and 5 non-structural proteins (ORF3a, ORF6,  
286 ORF9b, ORF7a and ORF1ab) (**Figure 1B, Supplementary Data S1**). These  
287 proteins increased over time showing a steeper upsurge already after 6 hpi, in  
288 agreement with the qPCR data (**Supplementary Figure 1**). Respectively, PCA

289 analysis of quantitative host-proteome features showed a clear separation  
 290 between early (2 and 6 hpi) and late (24 and 48 hpi) infection times (**Figure 1C**).  
 291 Host proteome regulation varied across time, showing preponderant  
 292 downregulation until 48 hpi, when most regulated proteins were up-regulated  
 293 compared to control (**Figures 1D and E, Supplementary Data S1**). For the time-  
 294 points of 2, 6, 12, 24 and 48 hpi, we identified a total of 110, 79, 117, 111 and 184  
 295 regulated proteins, respectively (**Figure 1E, Supplementary Data S1**).

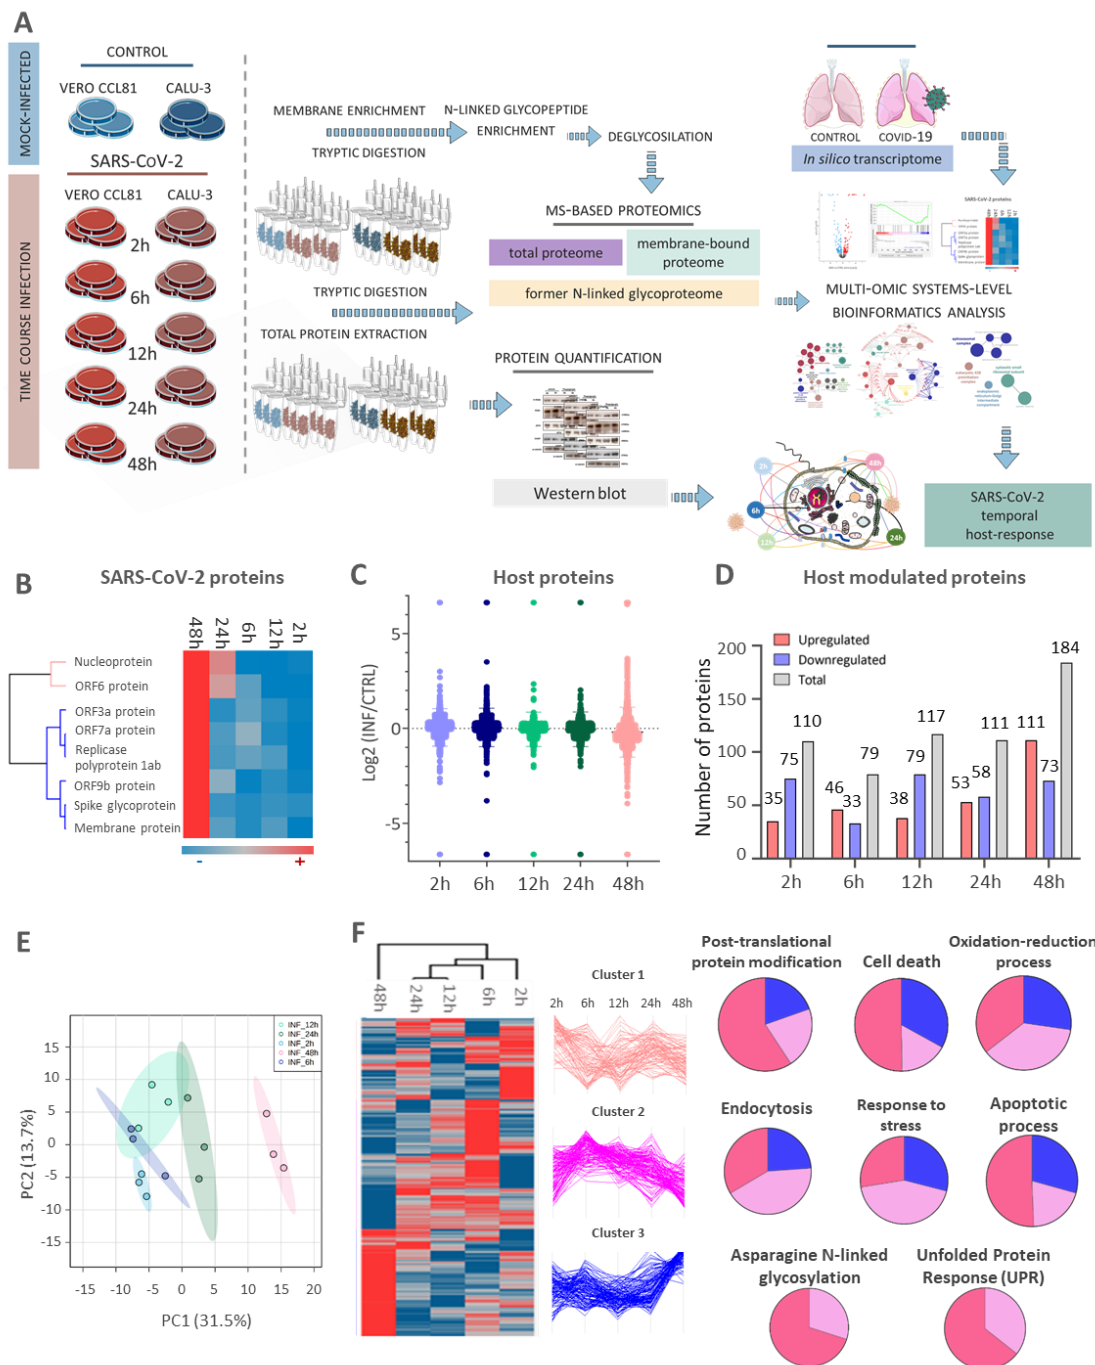

296

297 **Figure 1. Time-resolved proteome modulation upon SARS-CoV-2 infection.**  
298 Experimental approach applied to access spatiotemporal host-response to SARS-CoV-2  
299 infection included evaluation of proteome, membranome and N-deglycoproteome of  
300 infected cells combined with WB protein quantification and transcriptome analysis of lung  
301 tissue of COVID-19 patients (A). Heatmap of SARS-CoV-2 viral proteins expression. Red  
302 and blue colors indicate high and low expression, respectively (B); Principal component  
303 analysis of quantitative proteome changes during infection(C); Quantitative proteome  
304 profile of Vero cells infected with SARS-CoV-2 after 2h, 6h, 12h, 24h, and 48h. The log2  
305 ratio of infected vs control is shown (D); Vero cell proteins differentially regulated  
306 between the control (CTRL) and infected (INF) paired groups (q-value <0.05) at different  
307 time points. Red, blue and grey bars indicate up, down and total regulated proteins,  
308 respectively (E); Differentially regulated host proteins in at least one time point. Proteins  
309 were grouped into clusters associated with early, middle, and late events, respectively.  
310 Representation of enriched biological processes (BP) per cluster (q-value <0.05) (F).

311

312 To understand the global changes taking place in the host proteome during viral  
313 infection, we analyzed the differences in protein levels over time in a system-wide  
314 manner (**Figure 1F**). The host proteome already changed in the early time-points  
315 (2 and 6 hpi), but 48 hpi showed most extensive modulation. We identified three  
316 main clusters which contained proteins that participate in several key biological  
317 processes for early, middle and late times of host response expression profile  
318 (**Figure 1F**). Our analysis revealed processes related to post-translational protein  
319 modification, cell death, oxidation-reduction, endocytosis, response to stress,  
320 unfolded protein response (UPR), apoptosis and N-linked glycosylation (**Figure**  
321 **1F, Supplementary Data S1**). Interestingly, assessment of protein subcellular  
322 location showed that while ER-related proteins more representative in the early  
323 time-points than at 48 hpi, the opposite pattern was observed for Nucleus-related  
324 proteins (**Figure 2A**). We found the expression of proteins associated with  
325 glycosylation biosynthesis modulated through the course of infection (**Figure 2B,**  
326 **Supplementary Data S1**). Of note are the ones related to nucleotide sugar  
327 biosynthesis, proteoglycans and glycosyltransferases (**Figure 2C**) besides  
328 intracellular membrane-bound organelle, endomembrane system and  
329 extracellular region cellular location (**Figure 2D**). Moreover, biological processes  
330 and pathways related to stress response and Asparagine N-linked Glycosylation  
331 were already observed at 2 hpi. In addition, alteration of proteins involved in UPR  
332 regulation were observed at 6 hpi (**Figure 2E and F**). These data indicate a  
333 remodeling of the host glycoproteome upon SARS-CoV-2 infection.

334 Since we observed glycosylation processes and multiple biological processes  
335 involving ER and membrane proteins, we proceeded with the evaluation of  
336 membranome and N-deglycoproteome (**Figure 3A, Supplementary Data Set 2**).  
337 We found 323 proteins identified in all three approaches, showing an increase in  
338 proteome coverage by enriching for glycosylated and membrane proteins  
339 (**Figure 3A**). As observed in the proteome, the number of regulated proteins in  
340 the membranome also increased over time, and at 48 hpi the number of down-  
341 regulated proteins was higher than the up-regulated ones (**Figure 3B**). Host  
342 proteins associated to glycoconjugate biosynthesis were mapped (**Figure 3C**).  
343 Moreover, we identified 1,037 N-deglycopeptides from the host (**Figure 3D,**  
344 **Supplementary Data Set 2**), being 545 regulated ones belonging to 338 N-  
345 deglycoproteins (**Supplementary Data Set 2**). The number of regulated N-  
346 deglycopeptides increased over time, but differently from the total proteome,  
347 most of which were downregulated at 48 hpi (**Figure 3E, Supplementary Data**  
348 **Set 2**). Expression pattern of the regulated N-deglycopeptides indicated a  
349 formation of three clusters (**Figure 3F, Supplementary Data Set 3**). In the first  
350 cluster an increase in the N-deglycopeptide abundance was observed over time  
351 while in cluster 3 there was a decrease. The hydropathy score associated to N-  
352 deglycopeptides in cluster 3 was significantly higher than the ones in cluster 1  
353 (**Figure 3G**).

354 Moreover, abundance of viral proteins identified together with host membrane  
355 increased sharply at 48 hpi, as expected due to viral replication (**Figure 3H**). We  
356 were also able to quantify 20 SARS-CoV-2 formerly N-linked glycopeptides, being  
357 2 mapped to nucleoprotein, 1 to ORF8 protein and 17 to spike glycoprotein  
358 (**Figures 3I and J, Supplementary Data Set 2**). We modelled the spike protein  
359 and highlighted the identified glycosylation sites and their abundance change  
360 during infection (**Supplementary Figure 2**). Mapping the identified N-  
361 deglycopeptides associated to spike (P0DTC2) and ORF8 (P0DTC8) proteins  
362 surface illustrated possible sites crucial for their function (**Supplementary Figure**  
363 **2**).

364 Functional enrichment analysis of host regulated membrane proteins showed cell  
365 death, stress response and transport related processes already modulated at 2  
366 hpi. Processes and pathways related to post-translational modification and  
367 asparagine N-linked glycosylation were observed at 12 hpi, while apoptosis,  
368 protein folding and oxidative stress were among up-regulated processes at 24 hpi  
369 and 48 hpi (**Supplementary Data Set 3**).

370 By performing an integrated analysis of all MS-based approaches, we identified  
371 the formation of four clusters (**Figures 4A and B, Supplementary Data Set 3**),  
372 demonstrating again that ER-related processes and cell death are being regulated  
373 during infection (**Figure 4C and D, Supplementary Data Set 3**). ER-related  
374 processes were mostly regulated at intermediate time-points, similar to proteome  
375 findings. To visualize the regulated processes, we built protein networks for all  
376 clusters with regulated proteins found in the merged dataset. We found that Cell  
377 death, UPR and Response to endoplasmic reticulum stress shared common  
378 nodes (**Figure 4 E-I**).



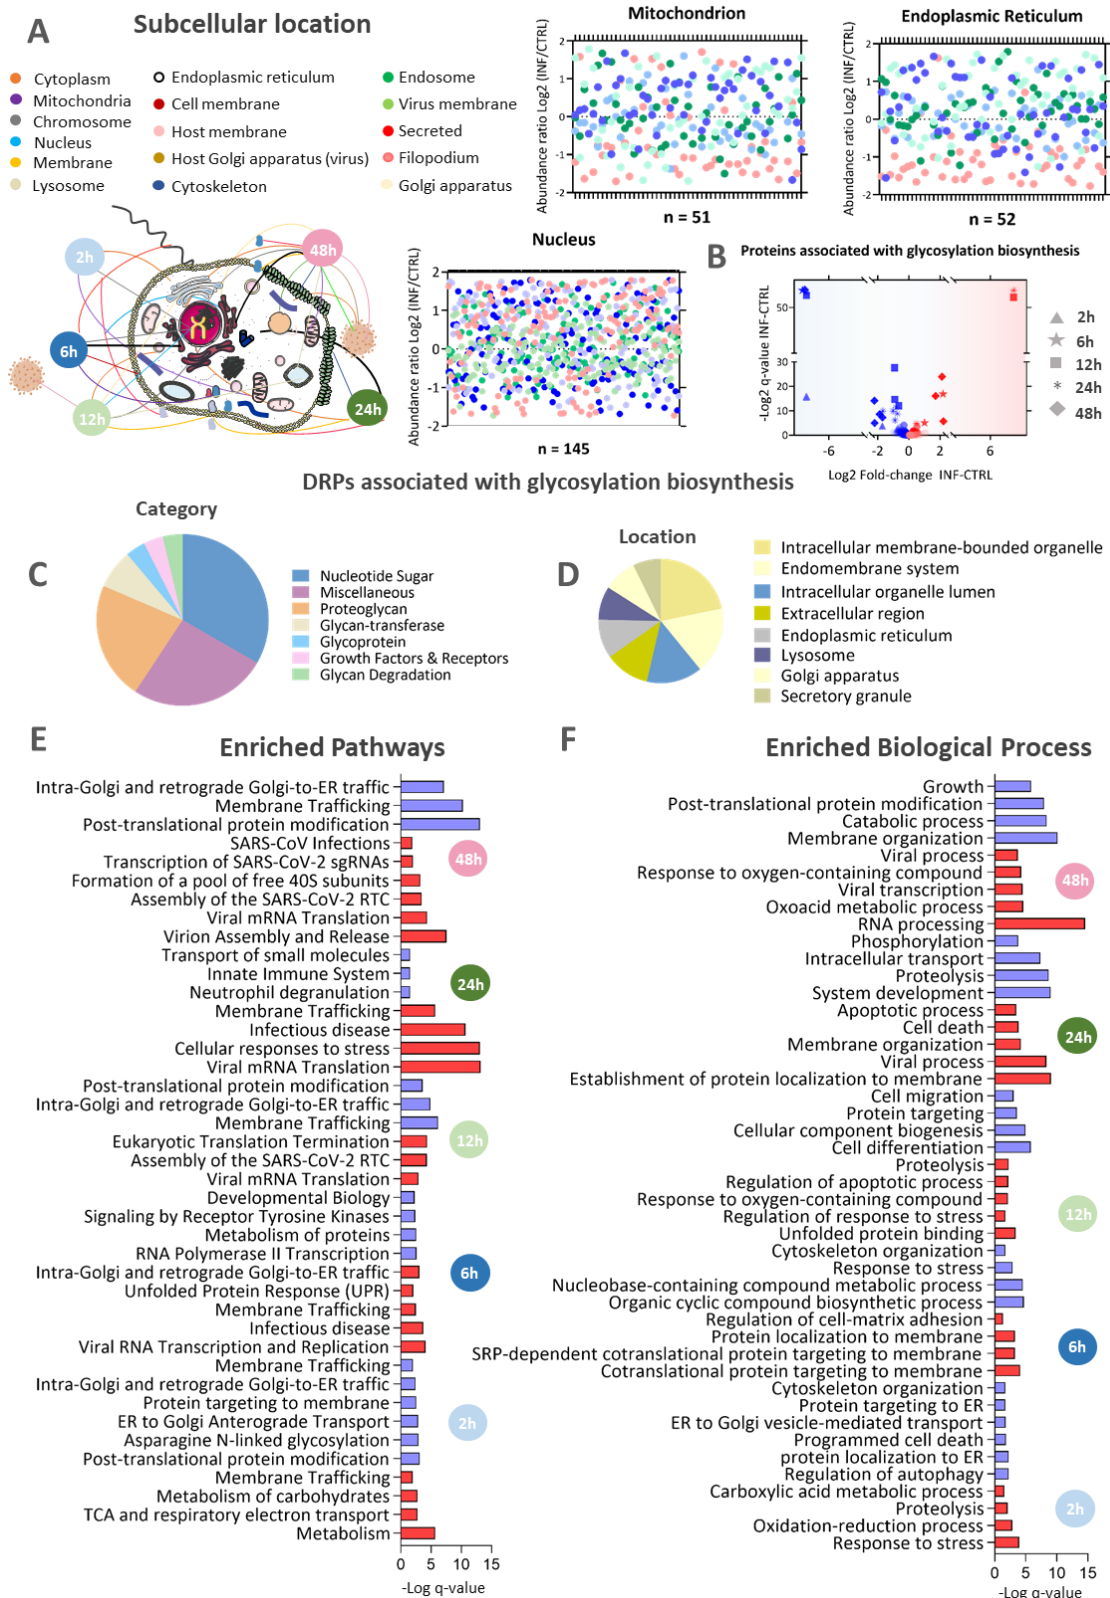

379

380 **Figure 2.** Time-resolved functional analysis of differentially expressed proteins upon  
 381 SARS-CoV-2 infection. Abundance ratio (log2 infected vs control) of differentially  
 382 regulated proteins associated to nucleus, mitochondria and ER according to infection  
 383 time (A); Volcano plot of proteins associated to the glycosylation biosynthesis modulated  
 384 in SARS-CoV-2-infected Vero cells vs control Up and downregulated proteins are



385 represented in red and blue, respectively (B); Category (C) and subcellular location (D)  
 386 of differently regulated proteins associated to the glycosylation biosynthesis. Enriched  
 387 pathways (E) and biological processes (BP) (F) at 2, 6, 12, 24 and 48 hpi (q-value <0.05).

388

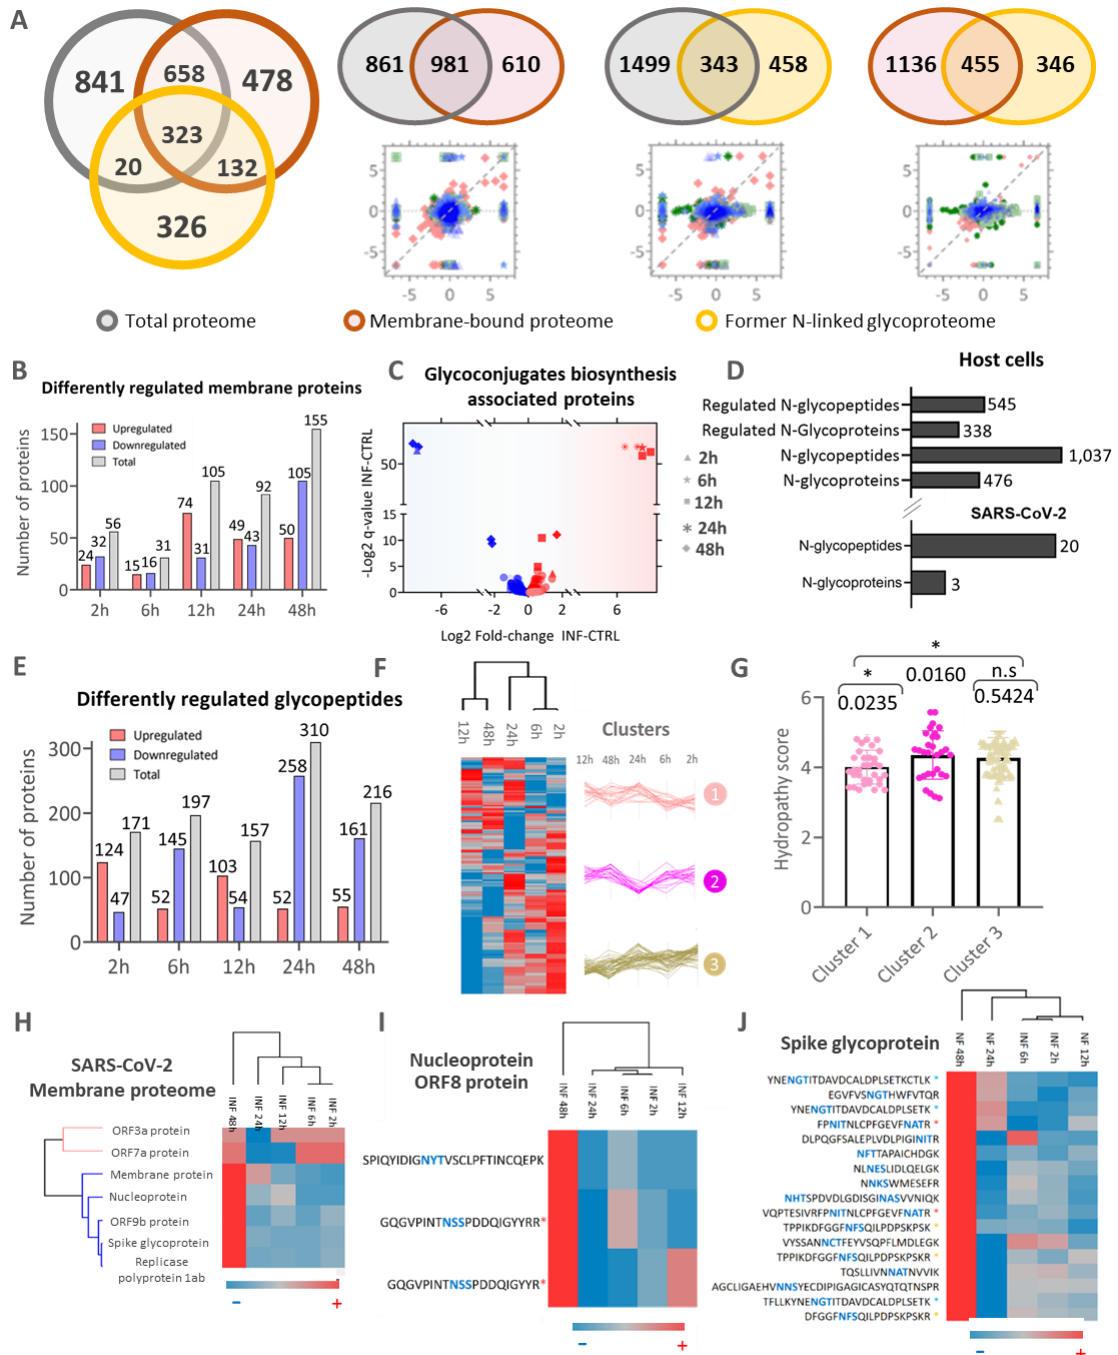

389

390 **Figure 3. Membranome and former N-linked host cells upon SARS-CoV-2 infection.**  
 391 Venn diagram indicating common and exclusive proteins identified in the total proteome  
 392 (gray), membranome (yellow), and N-deglycoproteome (orange) analysis. Scatter plots  
 393 indicate the correlation between common proteins between the three datasets (A); Vero  
 394 cells proteins differentially regulated membrane proteins at 2, 6, 12, 24 and 48 hpi (q-

395 value <0.05). Up, down and total regulated proteins are represented in red, blue and grey  
396 bars, respectively **(B)**. Regulation of membrane proteins associated with the  
397 glycoconjugates biosynthesis according to time of infection **(C)**; Glycopeptides and  
398 glycoproteins identified in the host cells and SARS-CoV-2 **(D)**; Differently regulated N-  
399 deglycopeptides between the infected (INF) and control (CTRL) groups (q-value <0.05  
400 **(E)**; Formerly N-linked glycopeptides differentially regulated in at least one  
401 comparison between infected (INF) and control (CTRL) groups **(F)**;  
402 Hydrophobicity score of clusters of differently regulated peptides in heatmap A  
403 **(G)**; SARS-CoV-2 viral proteins identified together with host membrane **(H)**; SARS-  
404 CoV-2 formerly N-linked glycopeptides mapped to nucleoprotein, replicase polyprotein  
405 1a, ORF8 glycoprotein **(I)** and spike glycoprotein **(J)**. Blue sequences present N-  
406 glycosylation sequon.

407

408

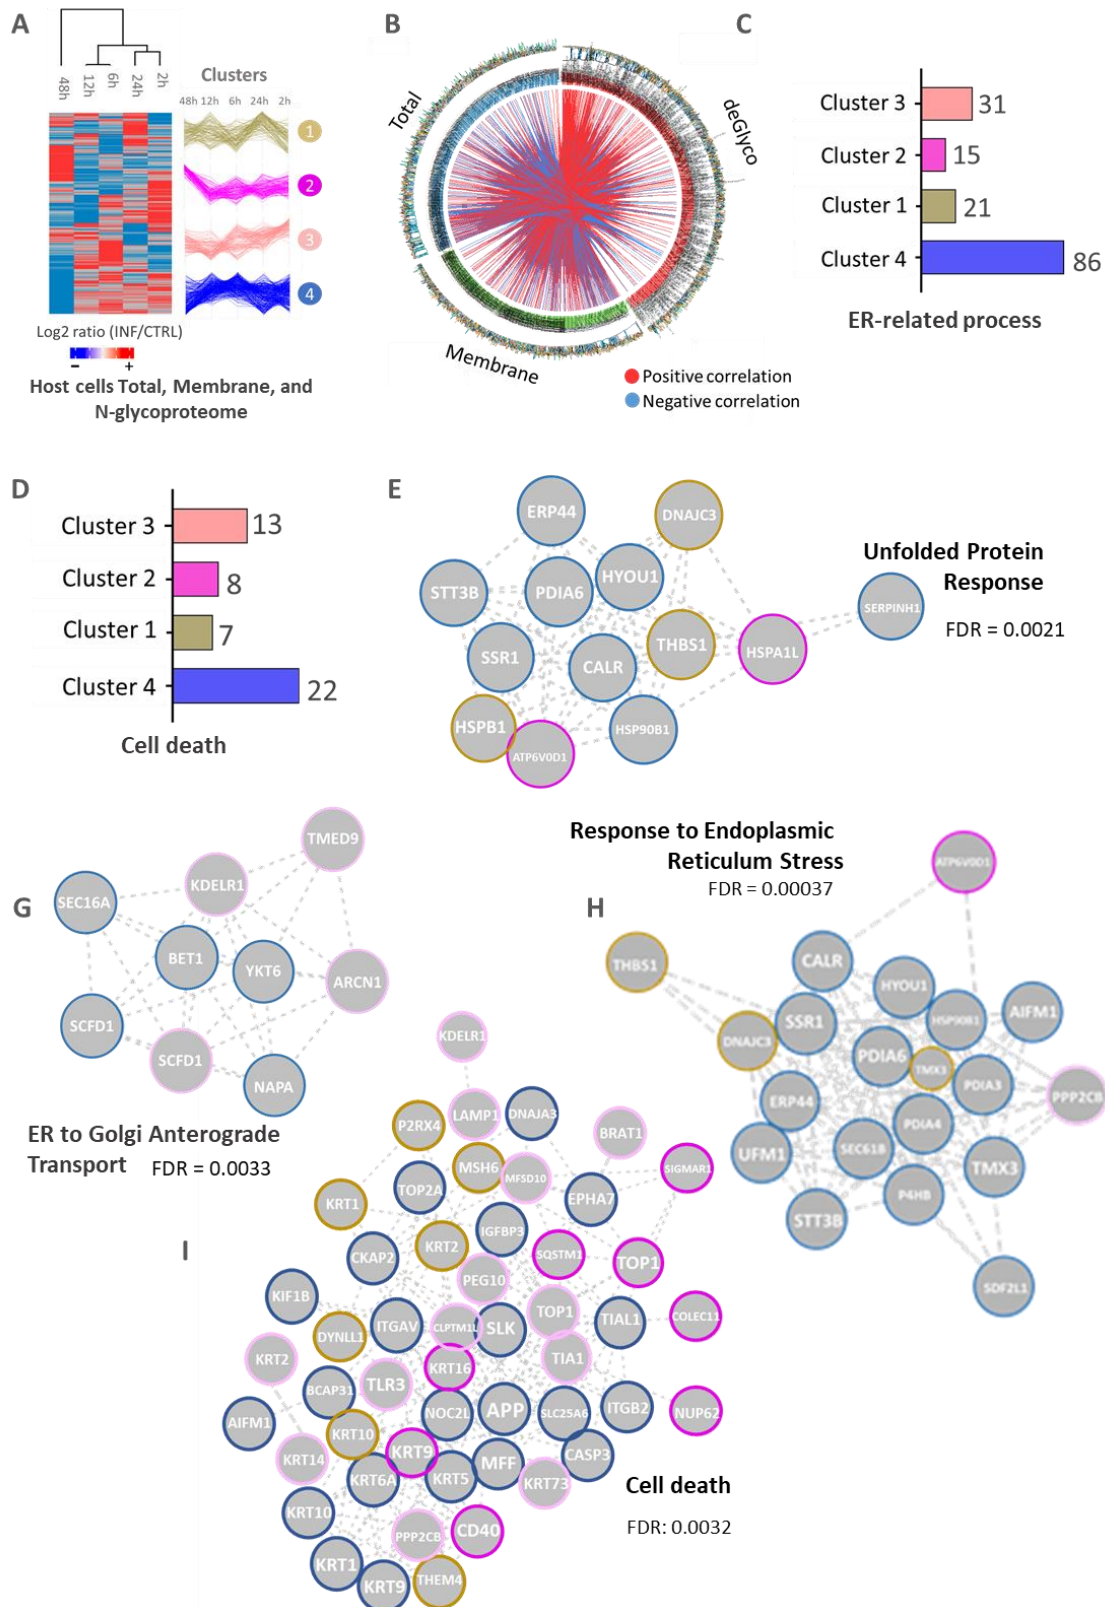

409

410 **Figure 4. Integrative analysis of MS-based proteome, membranome and N-**  
 411 **linked deglycoproteome.** Differentially regulated host proteins in at least one  
 412 group of a dataset (**A**); Correlation map indicating the positive (red) or negative  
 413 (blue) correlation between regulated proteins/peptides of different experimental  
 414 approaches (**B**); Proteins associated to Endoplasmic reticulum (ER) stress (**C**) and

415 cell death **(D)** identified in the clusters of heatmap and respective enriched  
416 protein-protein interaction networks (q-value <0.05) **(E-I)**.

417

418 To further explore and confirm the effects of the viral infection, we performed  
419 immunoblotting analysis focusing on specific molecular pathways regulated in a  
420 time-course manner. In particular, we evaluated the activation of ER-stress,  
421 unfolded protein response (UPR), cell death and oxidative stress markers. This  
422 validation was performed in Vero CCL-81 monkey and Calu-3 human cell lines.  
423 Increased phosphorylation levels of PERK and eIF2 $\alpha$  as well as protein levels of  
424 ATF4 were observed after 2h of viral infection presenting a peak at 6h in both cell  
425 lines tested (**Figures 5A-D, Supplementary Figures 3 and 4**). These results  
426 further confirmed that this UPR pathway was activated by the virus (**Figure 5A-**  
427 **D, Supplementary Figures 3 and 4**). In addition, higher levels of ATF6 and  
428 phosphorylated IRE1 $\alpha$  were seen only after 48h of infection (**Figure 5E,**  
429 **Supplementary Figures 3 and 4**). Interestingly, phosphorylated IRE1 $\alpha$  was not  
430 increased in Calu-3 cells (Supplementary Figure 3). The proteomic data have also  
431 detected higher levels of proteins related to apoptosis induction. Indeed, the  
432 western blot results demonstrated that CHOP, a protein linking UPR and  
433 apoptosis activation<sup>38</sup>, presented increased levels upon 6h of viral infection only  
434 in the more-susceptible Vero cells, indicating that apoptosis has been triggered  
435 in these cells by the virus (**Figure 5G, Supplementary Figures 3 and 4**). The  
436 detection of higher levels of cleaved caspase-3 clearly demonstrated apoptosis  
437 activation upon 48h of viral infection (**Figure 5H**).

438 Additionally, we investigated PERK-NRF2 pathway axis to understand the  
439 increased antioxidant response observed in the infected cells. Higher levels of  
440 these proteins were observed after 6 and 12h of viral infection (**Figures 5F, 5H,**  
441 **Supplementary Figures 3 and 4**). Interestingly, the proteomic data evidenced  
442 significant decreasing levels of proteins displaying a function related to  
443 antioxidant response in Vero cells at the same time points shown in **Figure 5F**  
444 and **Supplementary Figures 3 and 4**. These data pointed at a generation of  
445 oxidative stress upon viral infection with the corresponding activation of early  
446 antioxidant response in the host cells. Viral infection has been shown to induce

447 oxidative stress by ROS production to facilitate their replication in the host cell  
448 <sup>39,40</sup>. In some cases, viruses have the ability to suppress the NRF2 pathway in their  
449 favor <sup>41</sup>.

450 Since it is known that NRF2 can prevent cellular and tissue damage by decreasing  
451 the production of DAMPs (Damage-Associated Molecular Patterns) that are  
452 released by necrotic cells <sup>42</sup>. In addition, oxidative stress generated by redox  
453 imbalance contribute to viral pathogenesis, resulting in a massive induction of cell  
454 death <sup>43</sup>. Therefore, we decided to investigate some mechanisms of regulated cell  
455 death (RCD). Beside the caspase activation already described in Vero cells, we  
456 studied whether necroptosis and ferroptosis were also activated. For this  
457 purpose, the protein levels and/or the phosphorylation state of some components  
458 of these pathways were analyzed by western blot. Higher levels of MLKL  
459 phosphorylation were observed after 48h of viral infection in these cells indicating  
460 that part of cell death could be caused by necroptosis activation <sup>44</sup>  
461 (**Supplementary Figure 3**). This effect was not seen in Calu-3 cells. Higher levels  
462 of GPX4 at 6h of viral infection, in Vero and Calu-3 cells (**Supplementary Figure**  
463 **3 and 4**), could indicate that ferroptosis was not being activated, because GPX4  
464 may be part of the antioxidant mechanism activated by the PERK-NRF2 pathway,  
465 since GPX4 is also an established NRF2 transcriptional target <sup>45</sup>. Overall, these  
466 results indicate that at least two cell death regulated pathways are being activated  
467 by viral infection in Vero cells. Unlike what was observed in Vero cells, Calu-3  
468 cells presented no changes in cleaved caspases or MLKL phosphorylation levels  
469 upon viral activation until the last time point studied. These results led us to  
470 conclude that different cells may display different kinetics in cell death signaling  
471 pathways activation. This could be related to the existence of stronger  
472 homeostatic responses being triggered to avoid cell death. Indeed, previous  
473 results from our group have shown that Calu-3 cells exposed to viral infection  
474 start show signs of cell death only after 72h (data not shown).

475



476

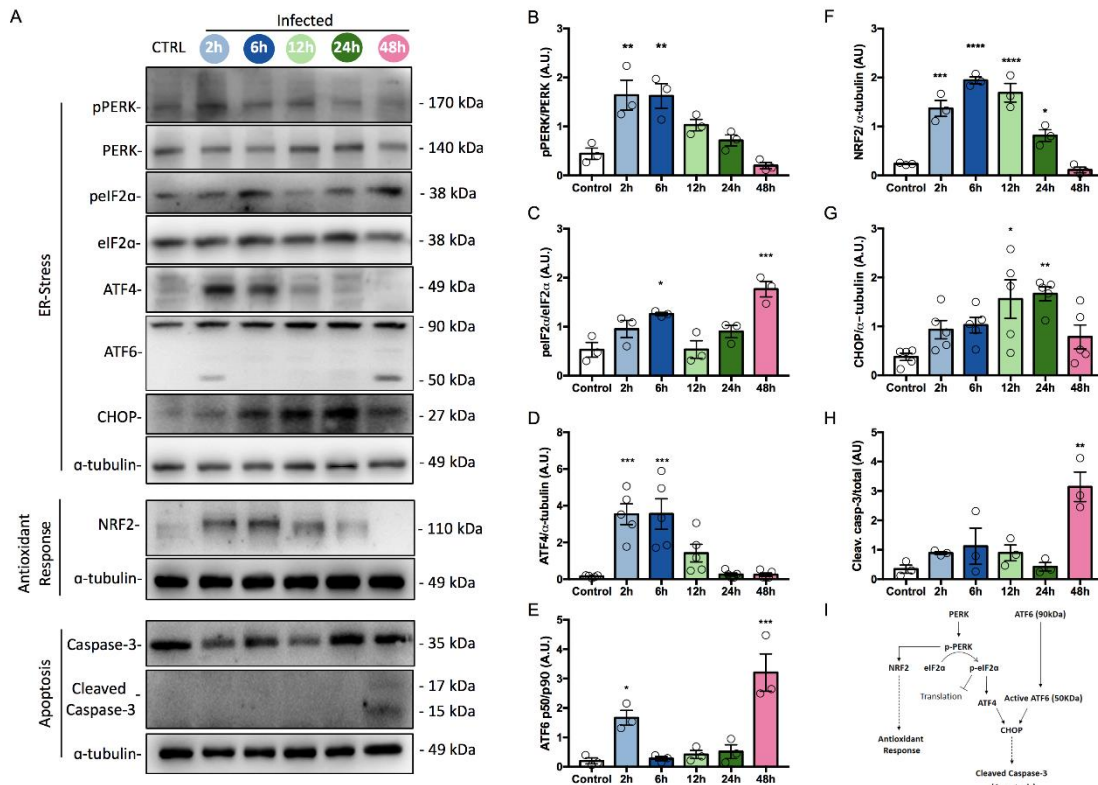

477

478 **Figure 5. SARS-CoV-2 infection induces ER-stress, antioxidant response and**  
 479 **apoptosis in Vero cells.** Representative images of Western blots of ER-stress,  
 480 antioxidant response and apoptosis proteins, as indicated (A). The corresponding  
 481 quantification of protein ratios of pPERK/PERK (B), peIF2α/eIF2α (C), ATF4/α-  
 482 tubulin (D), ATF6 p50/ ATF6 p90 (E), NRF2/α-tubulin (F), CHOP/α-tubulin (G) and  
 483 Cleaved Caspase-3/Caspase-3 (H). Schematic representation of ER-stress,  
 484 antioxidant response and apoptosis pathways activated after SARS-CoV-2  
 485 infection (I). Each dot represents an independent experiment (n≥3 independent  
 486 experiments; \*\*\*\* p<0.0001; \*\*\* p<0.001; \*\* p<0.005; \* p<0.05 vs Control).

487

488

489 To access further translational aspects of our *in vitro* findings, we re-analyzed  
 490 transcriptome data obtained from lung autopsies of eight patients who died as a  
 491 result of COVID-19 (Figure 6A) and the respective controls<sup>37</sup>. Using a dedicated  
 492 pipeline to reprocess the data with higher stringency in the statistical test, we  
 493 identified 1,398 regulated transcripts, being 636 up-regulated and 762 down-  
 494 regulated (Figure 6B). PCA analysis showed diverse transcriptome profile  
 495 between COVID-19 patients and controls. (Figure 6C). We observed that  
 496 differentially regulated transcripts were involved in several processes linked to

497 ER stress, such as cell death, chaperone-mediated folding, ‘de novo’ protein  
498 folding, protein localization to ER, programmed cell death, and protein folding,  
499 confirming the proteomic data (**Figures 6G and H**). Mapping ER-stress  
500 transcripts and proteins in clinical specimens from patients infected with SARS-  
501 CoV-2, it was possible to identify that RCN3, UCHL1, and ERO1A are upregulated  
502 in the lung at the level of transcript and proteome <sup>37</sup>. Moreover, we found 51 up-  
503 regulated and 45 down-regulated confirming the alteration of the host  
504 glycosylation biosynthetic machinery upon SARS-CoV-2 infection (**Figure 6F**).  
505 Interestingly, hierarchal clustering analysis showed that the infected samples 1,  
506 3, and 4 had a distinguished pattern of up-regulated ER-related transcripts  
507 (**Figure 6D**). It is worth to mention that the average survival time after being  
508 hospitalized was significantly higher in these three patients compared to the  
509 others (**Figure 6E**). These data confirm the regulation of ER-stress proteins during  
510 SARS-CoV-2 infection.

511 Taken together, our data indicated that SARS-CoV-2 infection modulates  
512 glycoconjugates biosynthetic machinery changing the host global protein  
513 glycosylation profile. Additionally, ER stress induced in infected cells activates  
514 PERK-eIF2 $\alpha$ -ATF4-CHOP UPR pathway finally leading to apoptosis induction. Cell  
515 death might also occur by necroptosis, linked to antioxidant response and  
516 activation of PERK-NRF2 pathway and MLKL phosphorylation. These *in vitro*  
517 phenomena were also observed in human lung biopsies of COVID-19 patients,  
518 indicating a role of ER protein modulation and survival time.

519



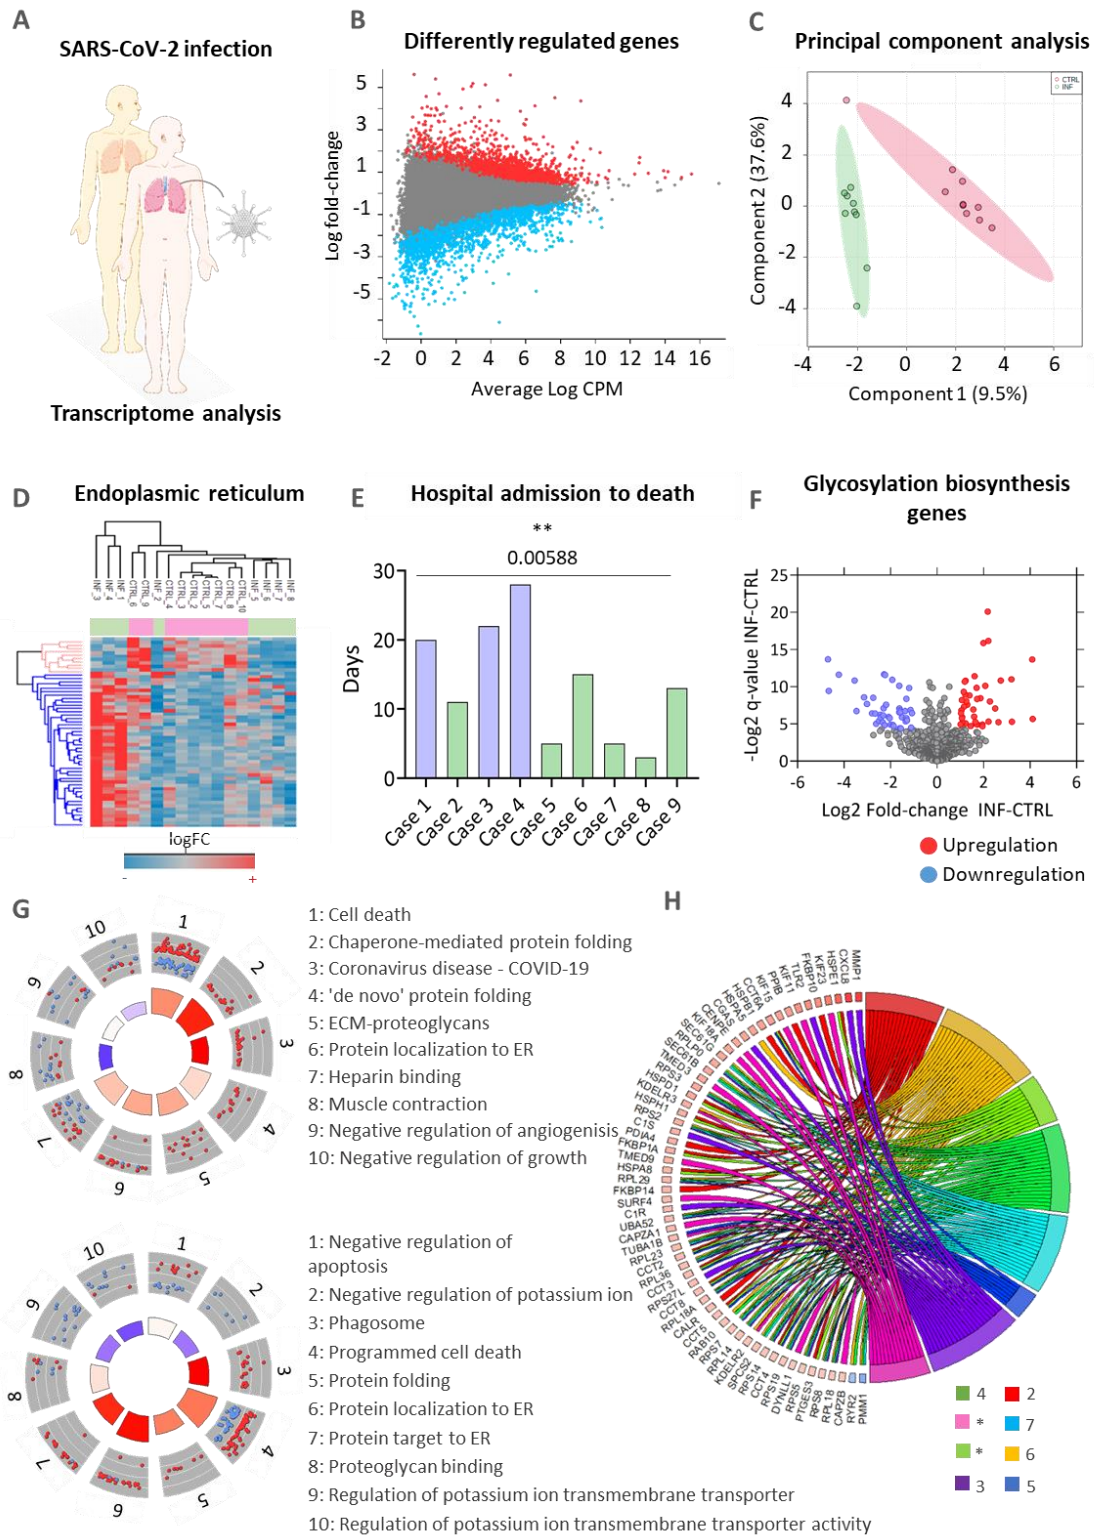

520

521 **Figure 6.** RNA-seq reanalysis data including samples of the lung of patients  
522 infected with SARS-CoV-2 and healthy samples from cancer donors (A),  
523 indicating the Differently regulated genes (B); Principal component analysis (C);  
524 Heatmap for differently regulated genes that are located in the endoplasmic  
525 reticulum (ER) (D); Hospital admission to death in days (E); Genes associated with  
526 the glycosylation biosynthesis alteration (F) and Gene ontology analysis (G-J).

527 The (\*) corresponds to Golgi-to-ER retrograde transport and the Establishment of  
528 protein localization to endoplasmic reticulum pathways.

529

## 530 **DISCUSSION**

531 SARS-CoV-2 hijacks several host machineries to control immune reaction <sup>46</sup>, viral  
532 protein translation <sup>47</sup>, viral genome packing into nascent viral particles as well as  
533 support the release of mature virus particles. Host cellular machineries are  
534 redirected to synthesize and remodel viral proteins through post-translational  
535 modifications such as proteolytic cleavages, disulfide bridges formation,  
536 phosphorylation, ubiquitination and glycosylation <sup>48-53</sup>. Thus, in this study we  
537 sought out which processes and pathways could be changed by the viral  
538 infection. Our proteomics approach yielded a total of 2778 proteins being 1842,  
539 1591 and 801 proteins identified in the total, membrane and glycosylated  
540 proteome, respectively. Even if the number of total identified proteins is  
541 comparable to other studies using similar technological platforms, we analyzed  
542 different time-points, cell lines and MOI. Grenga et al. (2020) identified 3220 host  
543 proteins and 6 SARS-CoV-2 proteins over 5 time-points evaluated (1, 2, 3, 4 and  
544 7 days) and two MOI (0.1 and 0.001) <sup>54</sup>. Stukalov et al. (2021) identified a total of  
545 5862 proteins in ACE2-expressing A549 cells infected with SARS-CoV-2 and  
546 SARS-CoV over three time points (6, 12, 24 hpi); concerning only regulated  
547 proteins, they found a total of 272 <sup>48</sup>, while we identified 443 regulated proteins  
548 using only Vero cells infected with SARS-CoV-2 over five time points. It should be  
549 noted that we used an earlier (2 h) and later (48 h) time point that influence the  
550 number of regulated proteins. Bojkova et al. (2020) identified over 7,000 proteins  
551 using Caco-2 infected cells at four time-points (2, 6, 10 and 24 hours) being over  
552 3,400 regulated proteins <sup>55</sup>. Using two different MOI (0.1 and 3), Zecha et al.  
553 (2020) identified 7,287 proteins and approximately 1,500 regulated host proteins  
554 in SARS-CoV-2 infected Vero cells in a single time-point (24 hpi) <sup>56</sup>.

555 Our results pointed at host proteome remodeling upon viral infection, consisting  
556 of protein global downregulation in all evaluated time points, except at 6 and 48  
557 hpi. Such pattern was also recently reported in the total proteome analysis

558 performed by Stukalov and collaborators (2021). Although they did not analyze  
559 the proteomic profile at 48 hpi, they observed that proteins were mostly down-  
560 regulated at 12 and 24 hpi but being up-regulated at 6 hpi<sup>48</sup>. Since it has already  
561 been shown that viral replication starts at 6 hpi<sup>57,58</sup>, the observed global protein  
562 up-regulation at 6 hpi could imply an initial response from the cell, followed by  
563 protein inhibition due to viral influence until 48 hpi, when cell death events are  
564 most prevalent. This remodeling was supported by PCA analysis, which showed  
565 a clear time-dependent separation.

566 Among the identified proteins, we found 8 viral proteins in all time-points.  
567 Compared with the work in Caco-2 cells performed by Bojkova et al. (2020)<sup>58</sup>, we  
568 did not identify the non-structural protein 8, and instead of identifying the  
569 replicase polyprotein a, we have identified the replicase polyprotein 1ab. Our data  
570 have confirmed part of the data published by Davidson et al.<sup>59</sup> using Vero cells.  
571 Indeed, we have identified the non-structural protein 9b but not proteins 8 or 9a.  
572 The viral proteins N, S, M, ORF1ab, ORF3a and ORF7a identified in this study  
573 were also found in the recent work of Grenga and collaborators (2020)<sup>54</sup>.

574 Regarding regulated biological processes and pathways, our results showed  
575 similarities when compared to other proteomics studies. A cluster analysis of  
576 SARS-CoV-2 infected Vero cells over a period of seven days indicated that  
577 membrane trafficking, protein pre-processing in the ER, clathrin-mediated  
578 endocytosis, vesicle-mediated transport, and viral life cycle were enriched during  
579 the infection<sup>54</sup>. Similarly, we have reported membrane trafficking, pathways  
580 related to the viral life cycle, and post-translational protein modification enriched  
581 in the regulated protein dataset. As already shown in infected Caco-2 cells, our  
582 pathway analysis has also identified that upon viral infection, TCA and respiratory  
583 electron transport as well as the carbohydrates metabolism processes were  
584 modulated. Other common regulated processes observed in the literature are  
585 autophagy, IFN- $\alpha/\beta$  induction or signaling, cell adhesion, and extracellular matrix  
586 organization<sup>48,56</sup>, being the regulation of IFN- $\alpha/\beta$  pathway extensively explored as  
587 a drug target for viral replication inhibition<sup>48</sup>. Besides similar processes and  
588 pathways during SARS-CoV-2 infection, we have focused on the effects of viral

589 replication in the ER-stress and UPR in a time-dependent manner. Through  
590 hierarchical clusters, we identified 3 main clusters that showed the effects of the  
591 viral infection in a time-dependent manner. Among the biological processes  
592 identified in the clusters, asparagine N-linked protein glycosylation, response to  
593 stress, unfolded protein response and post-translational protein modification  
594 were increased in the intermediate time-points, but decreased at 48 hpi.

595 Glycosylation of viral proteins is an important process that regulates viral  
596 assembly and infectivity. The structural and functional role of glycosylation in the  
597 SARS-CoV-2 spike protein has been widely investigated <sup>52,60–66</sup>. Of note is the fact  
598 that 35% of the SARS-CoV-2 spike glycoprotein contains carbohydrate moieties,  
599 which have profound influence on the viral infectivity, susceptibility to antibody  
600 neutralization <sup>67,68</sup>. The N-linked glycosylation sites of spike proteins have been  
601 related to alterations in its open or closed state thus interfering in its capacity to  
602 bind to the receptor <sup>69</sup>. We found 17 formerly N-glycopeptides and 14  
603 glycosylation sites in the Spike glycoprotein. There are 22 potential glycosylation  
604 sites in the SARS-CoV-2 Spike protein and the number of reported occupied sites  
605 range between 17 and 22 <sup>51,63,70,71</sup>. The processing of the spike glycoprotein  
606 through the ER and Golgi compartments represents an important step in  
607 controlling the virion assembly and inhibition of the N- and O-glycan maturation,  
608 which has been shown to interfere with virulence <sup>70,72–75</sup>. Additionally, we mapped  
609 the N-linked glycosylation site of ORF8 protein of SARS-CoV-2. This accessory  
610 protein has less than 20% identity with the same protein in SARS-CoV,  
611 highlighting divergencies between the two viruses <sup>76</sup>. Although this protein does  
612 not appear to be essential for viral replication, it has been shown to disrupt IFN-I  
613 and promote MHC-I downregulation <sup>77,78</sup>. ORF8 contains a signal peptide for ER  
614 import and interacts with several proteins within the ER. In this study, we have  
615 mapped one N-linked glycosylation site at N78. This site is close to a SARS-CoV-  
616 2-specific sequence YIDI<sup>76</sup>, that has been reported to be involved in noncovalent  
617 dimerization <sup>36</sup>. Antibodies against ORF8 were identified as serological markers  
618 of acute, convalescent and long-term response to SARS-CoV-2 infection <sup>79</sup>.  
619 Therefore, it would be relevant to evaluate the role of site-specific ORF8  
620 glycosylation in antibody neutralization.

621 The fact that asparagine N-linked glycosylation was enriched in the biological  
622 processes regulated during viral infection may indicate that the continuous  
623 translation of viral glycoproteins is overwhelming the glycosylation machinery  
624 capacity, increasing the number of proteins with aberrant glycosylation. This  
625 dysregulated process could contribute with ER stress, since it can increase  
626 protein misfolding<sup>80,81</sup>. Proteins related to asparagine N-linked glycosylation were  
627 reported among the top 10% of proteins following viral gene expression<sup>58</sup>. Thus,  
628 indicating a metabolic challenge for the host glycosylation machinery promoted  
629 by viral infection. A recent study has demonstrated that N-glycosylation inhibitors  
630 were able to reduce SARS-CoV-2 infection in Vero and HEK293<sup>ACE-2</sup> cells.  
631 Moreover, genetic ablation of this pathway using siRNAs and virions presenting  
632 N-glycosylation defects also reduced the infection rate<sup>82</sup>. Since we found that five  
633 enzymes involved in the glycosylation biosynthesis (CHST12, CHST14,  
634 B4GALT3, GCNT1 and MGAT2) were mainly up-regulated in the intermediate  
635 time-points, but down-regulated at 48 hpi, our data showed a complete  
636 remodeling of the N-linked protein glycosylation process. Recently, the  
637 downregulation of this process was also evaluated by the targeting of 88 host  
638 glyco genes by siRNAs in a study on the secretion of hepatitis B surface antigen  
639 (HBsAg) and HBV DNA, which showed that targeting CHST12 reduced the HBV  
640 DNA levels by >40% in EPG2.2.15.7 cells<sup>83</sup>. This further support the hypothesis  
641 that viral the viral infection can modulate the host glycosylation machinery.

642 Aberrant glycosylation can interfere in protein folding (PMID: 24609034). The  
643 effects of viral infection on protein folding were also observed in the functional  
644 enrichment analysis of the differentially abundant proteins identified in this study.  
645 Indeed, at 6 hpi we observed an increase in ER stress caused by misfolded or  
646 unfolded proteins with the up-regulation of UPR. Moreover, we confirmed the  
647 activation of ER stress and UPR in SARS-CoV-2-infected Vero and Calu-3 cells  
648 using western blotting. Several evidences suggest that ER stress and UPR  
649 activation are the main contributors to the pathogenesis of various diseases  
650 including viral infections<sup>84</sup>. Recent SARS-CoV-2 host interactome has been  
651 performed in HEK293, human bronchial epithelial 16HBEo- and A549 cells<sup>6,48,85</sup>  
652 . Proteins related to ER stress such as thrombospondin-1, GRP78, DJB11,



653 calnexin and F-box only protein 2 were found to interact with the spike protein  
654 <sup>86,87</sup>. In addition, other SARS-Cov-2 proteins were found to interact with proteins  
655 involved in ER protein quality control, ER morphology and protein glycosylation <sup>6</sup>.  
656 Cell surface GRP78 was identified to interact with the Middle East respiratory  
657 syndrome coronavirus spike glycoprotein and increase the viral entry <sup>88</sup>.  
658 Furthermore, SARS-CoV S glycoprotein was found to bind calnexin and increase  
659 its infectivity by modulating the maturation of the glycans <sup>89</sup>. Another host-virus  
660 protein-protein interaction analysis also pointed ER stress as being one of the  
661 pathways most affected by the SARS-CoV-2 proteins <sup>90</sup>. SARS-CoV 3a protein  
662 has been shown to be able to induce ER stress by activating PERK pathway  
663 resulting in increasing levels of eIF2 $\alpha$  phosphorylation and ATF4 protein level,  
664 which finally promoted the synthesis of CHOP and increased Huh7 cells apoptosis  
665 <sup>91</sup>. It is important to note that the authors have not observed signs of ATF6  
666 signaling pathway activation <sup>91</sup>. Another study with SARS-CoV showed that the  
667 suppression of the spike protein inhibits the up-regulation of BiP and GRP94  
668 chaperones, which are targets of PERK-eIF2 $\alpha$ -ATF4 pathway activation.  
669 Moreover, the authors reported the inhibition of this pathway promoted a  
670 decrease of these chaperones, pointing once again that UPR modulation by the  
671 virus could facilitate the infection process <sup>92</sup>. The stress-responsive heat shock  
672 protein gene HSP90AA1 was reported to be induced in H1299 and Calu-3 cells  
673 during infection, adding more evidence of ER stress occurring upon SARS-CoV-  
674 2 replication <sup>93</sup>. The activation of CHOP due to stress can induce the expression  
675 of BIM, linking ER stress induction with apoptosis activation <sup>94</sup>. Moreover, ATF4  
676 and CHOP can also activate the translation of genes related to translational  
677 components which will enhance protein synthesis in the cell, causing an increase  
678 in ROS production and consequently cell death <sup>95</sup>.

679 It has been shown prolonged ER stress can activate apoptosis pathway, which  
680 will conclude with the assembly of the apoptosome and caspase-3 activation <sup>96</sup>.  
681 We observed that apoptotic-related processes were mainly modulated in the late  
682 time events, indicating that cell death may be more frequent at 48 hpi.  
683 Additionally, the enriched pathway analysis showed that these processes started

684 at 12 hpi and remained active at 24 hpi. Although ER stress is predominantly the  
685 main cause of stress observed in this study, viruses have been shown to induce  
686 oxidative stress by ROS production in to facilitate their replication in the host cell  
687 <sup>39,40</sup>. Viral infections can induce the release of pro-oxidant cytokines such as the  
688 tumor necrosis factor (TNF), which lately will produce the hydroxyl radical OH <sup>97</sup>.  
689 A study in Huh-7 cells indicated that Ca<sup>2+</sup> released from the ER as a consequence  
690 of the human hepatitis C virus-induced ER stress will lead to an increase Ca<sup>2+</sup>  
691 upload by the mitochondria, where it will promote the generation of higher ROS  
692 levels and the consequent increase in oxidative stress <sup>98-101</sup>.

693 Besides caspase activation, we found increased phosphorylation of MLKL at 48  
694 hpi indicating a possible contribution of necroptosis induction upon viral infection.  
695 This dual mode of cell death mechanism has been reported in infected HFH4-  
696 hACE2 transgenic mouse model, Calu-3 cells and in postmortem lung sections of  
697 fatal COVID-19 patients <sup>102</sup>.

698 Since our study clearly points towards protein folding, ER stress and UPR  
699 modulation, which lead to cell death in later events, we sought if the effects of  
700 viral infection in these processes could also be seen not only *in vitro* models but  
701 also in human tissue biopsies. Our re-analysis of the post-mortem lung  
702 transcriptome of COVID-19 patients showed that processes related to protein  
703 folding and cell death are being regulated, which are in accordance with  
704 proteomics analysis showing increased levels of ER stress and UPR modulation.  
705 The processes identified in our re-analysis were not explored by the authors of  
706 the original work as their results focused on neutrophil activation and neutrophil-  
707 mediated immunity, extracellular traps and extracellular structure organization <sup>37</sup>.  
708 Interestingly, ER stress related pathways and processes are not well explored in  
709 transcriptomic studies, being processes and pathways related to immune  
710 response and inflammation more commonly found in the literature, such as  
711 modulation of cytokine-mediated signaling pathway, interferon signaling, TNF-  
712 signaling, and interleukin-mediated signaling <sup>54,103-105</sup>. Nevertheless, the  
713 enrichment analysis of these works often contains processes and pathways  
714 related to proteins transport and localization to ER. For example, the



715 transcriptional response of hACE2 receptor-transduced A549 and Calu-3 cell  
716 lines to SARS-CoV-2, MERS-CoV, or influenza A virus (IAV) infections focused on  
717 the autophagy pathway and mitochondrial processes, but UPR modulation was  
718 observed in the A549 lung epithelial cell line <sup>106</sup>. Interestingly, the authors  
719 compared the A549 cells infected with SARS-CoV-2 and IAV and found UPR  
720 modulated only in SARS-CoV-2 infection <sup>106</sup>. A recent study has shown that  
721 recombinant expression of SARS-CoV-2 spike protein in HEK293T cells induces  
722 ER-stress and UPR activation <sup>107</sup>. The increased expression of GRP78 and  
723 phosphorylated eIF2 $\alpha$  was reported together with increased LC3 II at 24 hours  
724 post spike transfection <sup>107</sup>. Treatment of transfected cells with UPR modulators  
725 reduced the ER stress levels <sup>107</sup>. However, this study did not provide a kinetic and  
726 comprehensive measurement of ER-stress and UPR activation, as reported here.

727 Our results corroborate recent findings on the identification of serum ER stress  
728 markers (GRP78 and phosphorylated PERK) in the lungs of COVID-19 patients  
729 with severe complications <sup>108</sup>. Proteomic analysis of multiple organs from patients  
730 infected with SARS-CoV-2 showed that, in addition to the lungs, there is an  
731 increase in ER stress in the renal cortex and liver cells. RCN3 is a protein located  
732 in the ER lumen that acts in the remodeling during lung injury <sup>109</sup>. RCN3-deficient  
733 mice has been shown to result in increased ER stress and apoptosis <sup>109,110</sup>. The  
734 ERO1A protein is a CHOP-activated oxidase that promotes ER hyperoxidation  
735 and affects the activation of CHOP-dependent apoptosis by stimulating the IP3R1  
736 1,4,5-triphosphate inositol receptor <sup>111,112</sup>. The UCHL1 protein performs important  
737 functions related to protein degradation <sup>113</sup>. In addition, it was observed that  
738 UCHL1 levels influence cell homeostasis under normal conditions of growth and  
739 oxidative stress <sup>114</sup>. The transcriptome of silenced cells for UCHL1 showed  
740 downregulation of genes associated with proteasome activity and upregulation of  
741 genes linked to ER-stress <sup>115</sup>. Moreover, we observed that samples from COVID-  
742 19 patients with higher expression of ER transcripts were associated to longer  
743 survival period.

744 Taken together, this study provides a time-resolved and large-scale  
745 characterization of the total, membrane and glycoproteome of SARS-CoV-2-

746 infected Vero CCL-81 cells. The modulation of specific processes including viral  
747 and host protein glycosylation, ER-stress and UPR were validated using western  
748 blotting and reanalysis of transcriptomic data of human clinical specimens. These  
749 data highlight the importance of ER-stress and UPR modulation as a host  
750 regulatory mechanism during viral infection and could point to novel therapeutic  
751 targets.

## 752 **Acknowledgments:**

753 The work was supported by grants and fellowships from FAPESP (2018/18257-1,  
754 2018/15549-1, 2020/04923-0 to GP; 2016/04676-7 to AFS; 2019/09517-2 to  
755 GSA; 2017/24769-2 to RRGM; 2016/20045-7 and 2020/06409-1 to ELD), from  
756 Coordenação de Aperfeiçoamento de Pessoal de Nível Superior – Brasil (CAPES)  
757 (Código de Financiamento 001 to LR-F; 88887.131387/2016-00 to DBA) and from  
758 Conselho Nacional de Desenvolvimento Científico Tecnológico (CNPq) (“bolsa  
759 de produtividade” to GP).

760 Professor Suely Kazue Nagahashi Marie from FM-USP is acknowledged for  
761 advice during manuscript writing and all the support.

## 762 **Author Contributions**

763 GP conceived the idea. LR-F and GP designed the experiments. LR-F, LCL, CBA  
764 and GP prepared the samples for proteomics analysis. LR-F, LCL, JMdS and GP  
765 analyzed the mass spectrometry data, performed bioinformatic analyses and  
766 wrote the manuscript. RRGM, DBA, DBLO and ELD performed the viral infection  
767 and RT-qPCR. CW and CRFM assisted on data interpretation. VdMG, AFS, GSA  
768 and LL performed and analyzed the western blotting. All authors contributed in  
769 editing the manuscript and approved the final version.

## 770 **References**

- 771 1. Guan, W. et al. Clinical Characteristics of Coronavirus Disease 2019 in China. 1–  
772 13 (2020) doi:10.1056/NEJMoa2002032.
- 773 2. Zhang, L. & Liu, Y. Potential interventions for novel coronavirus in China: A  
774 systematic review. *J. Med. Virol.* 92, 479–490 (2020).
- 775 3. Sohrabi, C. et al. World Health Organization declares global emergency: A review  
776 of the 2019 novel coronavirus (COVID-19). *Int. J. Surg.* 76, 71–76 (2020).

- 777 4. Chen, Y. & Li, L. SARS-CoV-2: virus dynamics and host response. *Lancet Infect.*  
778 *Dis.* 20, 515–516 (2020).
- 779 5. Mathews, P. et al. Host-pathogen interaction in COVID-19: Pathogenesis,  
780 potential therapeutics and vaccination strategies. *Immunobiology* 225, (2020).
- 781 6. Gordon, D. E. et al. A SARS-CoV-2 protein interaction map reveals targets for  
782 drug repurposing. *Nature* 583, 459–468 (2020).
- 783 7. Gordon, D. E. et al. Comparative host-coronavirus protein interaction networks  
784 reveal pan-viral disease mechanisms. *Science* (80-. ). 370, (2020).
- 785 8. Lum, K. K. & Cristea, I. M. Proteomic approaches to uncovering virus-host protein  
786 interactions during the progression of viral infection. *Expert Rev. Proteomics* 13, 325–  
787 340 (2016).
- 788 9. Rudd, P. M. et al. Glycosylation and the Immune System. *Science* (80-. ). 2370,  
789 (2012).
- 790 10. Reitter, Jullie N; Means, Robert E; Desrosiers, R. C. A role for carbohydrates in  
791 immune evasion in AIDS. *Nat. Med.* 56, 679–684 (1998).
- 792 11. Wagner, R., Wolff, T., Herwig, A., Pleschka, S. & Liebig-universita, J.  
793 Interdependence of Hemagglutinin Glycosylation and Neuraminidase as Regulators of  
794 Influenza Virus Growth : a Study by Reverse Genetics. *J. Virol.* 74, 6316–6323 (2000).
- 795 12. Shirato, K. et al. Viral envelope protein glycosylation is a molecular determinant  
796 of the neuroinvasiveness of the New York strain of West Nile virus. *J. Gen. Virol.* 85,  
797 3637–3645 (2004).
- 798 13. Laine, R. A. The case for re-examining glycosylation inhibitors, mimetics, primers  
799 and glycosylation decoys as antivirals and anti-inflammatories in covid19. *Glycobiology*  
800 30, 763–767 (2020).
- 801 14. Dwek, R. A., Butters, T. D., Platt, F. M. & Zitzmann, N. Targeting glycosylation as  
802 a therapeutic approach. *Nat. Rev. Drug Discov.* 1, 65–75 (2002).
- 803 15. Fung, T. S. & Liu, D. X. Coronavirus infection, ER stress, apoptosis and innate  
804 immunity. *Front. Microbiol.* 5, 1–13 (2014).
- 805 16. Ron, D. & Walter, P. Signal integration in the endoplasmic reticulum unfolded  
806 protein response. *Nat. Rev. Mol. Cell Biol.* 8, 519–529 (2007).
- 807 17. Cao, S. S. & Kaufman, R. J. Unfolded protein response. *Curr. Biol.* 22, R622–R626  
808 (2012).
- 809 18. Greco, T. M. & Cristea, I. M. Proteomics Tracing the Footsteps of Infectious  
810 Disease \*. *Am. Soc. Biochem. Mol. Biol.* 5–14 (2017) doi:10.1074/mcp.O116.066001.
- 811 19. Weekes, M. P. et al. Quantitative Temporal Viromics : An Approach to Investigate  
812 Host-Pathogen Interaction. *Cell* 157, 1460–1472 (2014).
- 813 20. Araujo, D. B. et al. SARS-CoV-2 isolation from the first reported patients in brazil  
814 and establishment of a coordinated task network. *Mem. Inst. Oswaldo Cruz* 115, 1–8  
815 (2020).
- 816 21. Corman, V. et al. Detection of 2019 novel coronavirus (2019-nCoV) by real time  
817 RT-PCR. *Euro Surveill* 25, 1–8 (2020).
- 818 22. Rosa-Fernandes, L. et al. Cellular Imprinting Proteomics Assay: A Novel Method  
819 for Detection of Neural and Ocular Disorders Applied to Congenital Zika Virus Syndrome.  
820 *J. Proteome Res.* 19, 4496–4515 (2020).
- 821 23. Palmisano, G. et al. A novel method for the simultaneous enrichment,  
822 identification, and quantification of phosphopeptides and sialylated glycopeptides  
823 applied to a temporal profile of mouse brain development. *Mol. Cell. Proteomics* 11,  
824 1191–1202 (2012).
- 825 24. Fujiki, Y., Hubbard, L., Fowler, S. & Lazarow, P. B. Isolation of intracellular  
826 membranes by means of sodium carbonate treatment: Application to Endoplasmic  
827 Reticulum. *J. Cell Biol.* 93, 97–102 (1982).

- 828 25. Palmisano, G. et al. Selective enrichment of sialic acid-containing glycopeptides  
829 using titanium dioxide chromatography with analysis by HILIC and mass spectrometry.  
830 *Nat. Protoc.* 5, 1974–1982 (2010).
- 831 26. Kawahara, R. et al. Integrated proteomics reveals apoptosis-related mechanisms  
832 associated with placental malaria. *Mol. Cell. Proteomics* 18, 182–199 (2019).
- 833 27. Mysling, S., Palmisano, G., Hojrup, P. & Thaysen-Andersen, M. Utilizing ion-  
834 pairing hydrophilic interaction chromatography solid phase extraction for efficient  
835 glycopeptide enrichment in glycoproteomics. *Anal. Chem.* 82, 5598–5609 (2010).
- 836 28. Perez-Riverol, Y. et al. The PRIDE database and related tools and resources in  
837 2019: Improving support for quantification data. *Nucleic Acids Res.* 47, D442–D450  
838 (2019).
- 839 29. Mart, P. et al. General Statistical Framework for Quantitative Proteomics by Stable  
840 Isotope Labeling. *J. Proteome Res.* 13, 1234–1247 (2014).
- 841 30. Walter, W., Sánchez-Cabo, F. & Ricote, M. GOplot: An R package for visually  
842 combining expression data with functional analysis. *Bioinformatics* 31, 2912–2914  
843 (2015).
- 844 31. Reimand, J., Kull, M., Peterson, H., Hansen, J. & Vilo, J. G:Profiler—a web-based  
845 toolset for functional profiling of gene lists from large-scale experiments. *Nucleic Acids*  
846 *Res.* 35, 193–200 (2007).
- 847 32. Jassal, B. et al. The reactome pathway knowledgebase. *Nucleic Acids Res.* 48,  
848 D498–D503 (2020).
- 849 33. Osorio, D., Rondón-Villarreal, P. & Torres, R. Peptides: A package for data mining  
850 of antimicrobial peptides. *R J.* 7, 4–14 (2015).
- 851 34. Rohart, F., Gautier, B., Singh, A. & Lê Cao, K. A. mixOmics: an R package for  
852 ‘omics feature selection and multiple data integration. *bioRxiv* 1–19 (2017)  
853 doi:10.1101/108597.
- 854 35. Wrapp, D. et al. Cryo-EM structure of the 2019-nCoV spike in the prefusion  
855 conformation. *bioRxiv* 1263, 1260–1263 (2020).
- 856 36. Flower, T. G. et al. Structure of SARS-CoV-2 ORF8, a rapidly evolving coronavirus  
857 protein implicated in immune evasion. *bioRxiv* 1–6 (2020)  
858 doi:10.1101/2020.08.27.270637.
- 859 37. Wu, M. et al. Transcriptional and proteomic insights into the host response in fatal  
860 COVID-19 cases. *Proc. Natl. Acad. Sci. U. S. A.* 117, 28336–28343 (2020).
- 861 38. Hu, H., Tian, M., Ding, C. & Yu, S. The C/EBP homologous protein (CHOP)  
862 transcription factor functions in endoplasmic reticulum stress-induced apoptosis and  
863 microbial infection. *Front. Immunol.* 10, 1–13 (2019).
- 864 39. Liu, T. et al. Reactive oxygen species mediate virus-induced STAT activation: Role  
865 of tyrosine phosphatases. *J. Biol. Chem.* 279, 2461–2469 (2004).
- 866 40. Lee, Y. H. et al. Influenza A virus induction of oxidative stress and MMP-9 is  
867 associated with severe lung pathology in a mouse model. *Virus Res.* 178, 411–422  
868 (2013).
- 869 41. Hosakote, Y. M. et al. Viral-mediated inhibition of antioxidant enzymes contributes  
870 to the pathogenesis of severe respiratory syncytial virus bronchiolitis. *Am. J. Respir. Crit.*  
871 *Care Med.* 183, 1550–1560 (2011).
- 872 42. Tang, W., Jiang, Y. F., Ponnusamy, M. & Diallo, M. Role of Nrf2 in chronic liver  
873 disease. *World J. Gastroenterol.* 20, 13079–13087 (2014).
- 874 43. Garofalo, R. P., Kollis, D. & Casola, A. Respiratory syncytial virus infection:  
875 Mechanisms of redox control and novel therapeutic opportunities. *Antioxidants Redox*  
876 *Signal.* 18, 186–217 (2013).
- 877 44. Wang, H. et al. Mixed Lineage Kinase Domain-like Protein MLKL Causes Necrotic  
878 Membrane Disruption upon Phosphorylation by RIP3. *Mol. Cell* 54, 133–146 (2014).

- 879 45. Dodson, M., Castro-Portuguez, R. & Zhang, D. D. NRF2 plays a critical role in  
880 mitigating lipid peroxidation and ferroptosis. *Redox Biol.* 23, 101107 (2019).
- 881 46. Jiang, H. wei et al. SARS-CoV-2 Orf9b suppresses type I interferon responses by  
882 targeting TOM70. *Cell. Mol. Immunol.* 17, 998–1000 (2020).
- 883 47. Schubert, K. et al. SARS-CoV-2 Nsp1 binds the ribosomal mRNA channel to  
884 inhibit translation. *Nat. Struct. Mol. Biol.* 27, 959–966 (2020).
- 885 48. Stukalov, A. et al. Multi-level proteomics reveals host-perturbation strategies of  
886 SARS-CoV-2 and SARS-CoV. *bioRxiv* (2020) doi:10.1101/2020.06.17.156455.
- 887 49. Coutard, B. et al. The spike glycoprotein of the new coronavirus 2019-nCoV  
888 contains a furin-like cleavage site absent in CoV of the same clade. *Antiviral Res.* 176,  
889 104742 (2020).
- 890 50. Bangaru, S. et al. Structural analysis of full-length SARS-CoV-2 spike protein from  
891 an advanced vaccine candidate. *bioRxiv* 1094, 1089–1094 (2020).
- 892 51. Watanabe, Y., Allen, J. D., Wrapp, D., McLellan, J. S. & Crispin, M. Site-specific  
893 glycan analysis of the SARS-CoV-2 spike. *Science* (80-. ). 369, 330–333 (2020).
- 894 52. Zhang, S. et al. Analysis of glycosylation and disulfide bonding of wild-type SARS-  
895 CoV-2 spike glycoprotein. *bioRxiv* (2021).
- 896 53. Roberts, D. S. et al. Structural O-Glycoform Heterogeneity of the SARS-CoV-2  
897 Spike Protein Receptor-Binding Domain Revealed by Native Top-Down Mass  
898 Spectrometry. *bioRxiv* 2021.02.28.433291 (2021).
- 899 54. Grenga, L. et al. Shotgun proteomics analysis of SARS-CoV-2-infected cells and  
900 how it can optimize whole viral particle antigen production for vaccines. *Emerg. Microbes*  
901 *Infect.* 1–18 (2020) doi:10.1080/22221751.2020.1791737.
- 902 55. Bojkova, D. et al. SARS-CoV-2 infected host cell proteomics reveal potential  
903 therapy targets. 1–24 (2020) doi:10.21203/rs.3.rs-17218/v1.
- 904 56. Zecha, J. et al. Data, Reagents, Assays and Merits of Proteomics for SARS-CoV-  
905 2 Research and Testing. *Mol. Cell. Proteomics* 19, 1503–1522 (2020).
- 906 57. van den Berg, D. F. & te Velde, A. A. Severe COVID-19: NLRP3 Inflammasome  
907 Dysregulated. *Front. Immunol.* 11, 1–6 (2020).
- 908 58. Bojkova, D. et al. Proteomics of SARS-CoV-2-infected host cells reveals therapy  
909 targets. *Nature* 583, 469–472 (2020).
- 910 59. Davidson, A. D. et al. Characterisation of the transcriptome and proteome of  
911 SARS-CoV-2 reveals a cell passage induced in-frame deletion of the furin-like cleavage  
912 site from the spike glycoprotein. *bioRxiv* 1–15 (2020) doi:10.1101/2020.03.22.002204.
- 913 60. Miller, L. M. et al. Heterogeneity of Glycan Processing on Trimeric SARS-CoV-2  
914 Spike Protein Revealed by Charge Detection Mass Spectrometry. *J. Am. Chem. Soc.*  
915 (2021) doi:10.1021/jacs.1c00353.
- 916 61. Bagdonaitė, I. et al. Site-Specific O-Glycosylation Analysis of SARS-CoV-2 Spike  
917 Protein Produced in Insect and Human Cells. *Viruses* 13, 1–14 (2021).
- 918 62. Zhang, Y. et al. Site-specific N-glycosylation Characterization of Recombinant  
919 SARS-CoV-2 Spike Proteins. *Mol. Cell. Proteomics* 20, 100058 (2021).
- 920 63. Wang, D. et al. Comprehensive Analysis of the Glycan Complement of SARS-  
921 CoV-2 Spike Proteins Using Signature Ions-Triggered Electron-Transfer/Higher-Energy  
922 Collisional Dissociation (ETHcD) Mass Spectrometry. *Anal. Chem.* 92, 14730–14739  
923 (2020).
- 924 64. Pineda, J. A. A. P. et al. Structural and functional analysis of female sex hormones  
925 against SARS-Cov2 cell entry. *bioRxiv* (2020).
- 926 65. Gao, C. et al. SARS-CoV-2 Spike Protein Interacts with Multiple Innate Immune  
927 Receptors. *bioRxiv* (2020) doi:10.1101/2020.07.29.227462.
- 928 66. Zhou, D., Tian, X., Qi, R., Peng, C. & Zhang, W. Identification of 22 N-glycosites  
929 on spike glycoprotein of SARS-CoV-2 and accessible surface glycopeptide motifs:  
930 Implications for vaccination and antibody therapeutics. *Glycobiology* 31, 69–80 (2021).



- 931 67. Casalino, L. et al. Beyond shielding: The roles of glycans in the SARS-CoV-2 spike  
932 protein. *ACS Cent. Sci.* 6, 1722–1734 (2020).
- 933 68. Zhang, L. et al. Furin cleavage of the SARS-CoV-2 spike is modulated by O-  
934 glycosylation. *bioRxiv* 2021.02.05.429982 (2021).
- 935 69. Henderson, R. et al. Controlling the SARS-CoV-2 spike glycoprotein  
936 conformation. *Nat. Struct. Mol. Biol.* 27, 925–933 (2020).
- 937 70. Shajahan, A., Supekar, N. T., Gleinich, A. S. & Azadi, P. Deducing the N- And O-  
938 glycosylation profile of the spike protein of novel coronavirus SARS-CoV-2. *Glycobiology*  
939 30, 981–988 (2020).
- 940 71. Zhao, P. et al. Virus-Receptor Interactions of Glycosylated SARS-CoV-2 Spike  
941 and Human ACE2 Receptor. *Cell Host Microbe* 28, 586-601.e6 (2020).
- 942 72. Yang, Q. et al. Inhibition of SARS-CoV-2 viral entry in vitro upon blocking N- and  
943 O-glycan elaboration. *bioRxiv* 1–19 (2020) doi:10.1101/2020.10.15.339838.
- 944 73. Dawood, A. A. & Altobje, M. A. Inhibition of N-linked Glycosylation by Tunicamycin  
945 May Contribute to The Treatment of SARS-CoV-2. *Microb. Pathog.* 149, 104586 (2020).
- 946 74. Boson, B. et al. The SARS-CoV-2 envelope and membrane proteins modulate  
947 maturation and retention of the spike protein, allowing assembly of virus-like particles. *J.*  
948 *Biol. Chem.* 296, 100111 (2021).
- 949 75. Li, Q. et al. The Impact of Mutations in SARS-CoV-2 Spike on Viral Infectivity and  
950 Antigenicity. *Cell* 182, 1284-1294.e9 (2020).
- 951 76. Mohammad, S. et al. Sars-cov-2 orf8 and sars-cov orf8ab: Genomic divergence  
952 and functional convergence. *Pathogens* 9, 1–26 (2020).
- 953 77. Li, J. et al. The ORF6, ORF8 and nucleocapsid proteins of SARS-CoV-2 inhibit  
954 type I interferon signaling pathway. *Virus Res.* 286, (2020).
- 955 78. Zhang, Y. et al. The ORF8 protein of SARS-CoV-2 mediates immune evasion  
956 through potentially downregulating MHC-I. *bioRxiv* (2020) doi:10.1101/2020.05.24.111823.
- 957 79. Hachim, A. et al. ORF8 and ORF3b antibodies are accurate serological markers  
958 of early and late SARS-CoV-2 infection. *Nat. Immunol.* 21, 1293–1301 (2020).
- 959 80. Shental-Bechor, D. & Levy, Y. Effect of glycosylation on protein folding: A close  
960 look at thermodynamic stabilization. *Proc. Natl. Acad. Sci. U. S. A.* 105, 8256–8261  
961 (2008).
- 962 81. Adams, C. J., Kopp, M. C., Larburu, N., Nowak, P. R. & Ali, M. M. U. Structure and  
963 molecular mechanism of ER stress signaling by the unfolded protein response signal  
964 activator IRE1. *Front. Mol. Biosci.* 6, 1–12 (2019).
- 965 82. Casas-Sanchez, A. et al. Protein glycosylation is essential for SARS-CoV-2  
966 infection. *bioRxiv* 2021.02.05.429940 (2021).
- 967 83. Ito, K. et al. Screening siRNAs against host glycosylation pathways to develop  
968 novel antiviral agents against hepatitis B virus. *Hepatol. Res.* 50, 1128–1140 (2020).
- 969 84. Manalo, R. V. M. & Medina, P. M. B. The endoplasmic reticulum stress response  
970 in disease pathogenesis and pathophysiology. *Egypt. J. Med. Hum. Genet.* 19, 59–68  
971 (2018).
- 972 85. Bamberger, C. et al. The Host Interactome of Spike Expands the Tropism of  
973 SARS-CoV-2. *bioRxiv* 2021.02.16.431318 (2021).
- 974 86. Lynch, J. M. et al. A thrombospondin-dependent pathway for a protective  
975 ERstress response. 149, 1257–1268 (2012).
- 976 87. Zhang, H. J. et al. Epstein-Barr virus activates F-box protein FBXO2 to limit viral  
977 infectivity by targeting glycoprotein B for degradation. *PLoS Pathog.* 14, 1–22 (2018).
- 978 88. Chu, H. et al. Middle East respiratory syndrome coronavirus and bat coronavirus  
979 HKU9 both can utilize GRP78 for attachment onto host cells. *J. Biol. Chem.* 293, 11709–  
980 11726 (2018).

- 981 89. Fukushi, M. et al. Monitoring of S Protein Maturation in the Endoplasmic  
982 Reticulum by Calnexin Is Important for the Infectivity of Severe Acute Respiratory  
983 Syndrome Coronavirus. *J. Virol.* 86, 11745–11753 (2012).
- 984 90. Li, J. et al. Virus-Host Interactome and Proteomic Survey Reveal Potential  
985 Virulence Factors Influencing SARS-CoV-2 Pathogenesis. *Med* 2, 99–112.e7 (2021).
- 986 91. Minakshi, R. et al. The SARS coronavirus 3a protein causes endoplasmic  
987 reticulum stress and induces ligand-independent downregulation of the Type 1 interferon  
988 receptor. *PLoS One* 4, 1–10 (2009).
- 989 92. Chan, C.-P. et al. Modulation of the Unfolded Protein Response by the Severe  
990 Acute Respiratory Syndrome Coronavirus Spike Protein. *J. Virol.* 80, 9279–9287 (2006).
- 991 93. Wyler, E. et al. Transcriptomic profiling of SARS-CoV-2 infected human cell lines  
992 identifies HSP90 as target for COVID-19 therapy. *iScience* 24, (2021).
- 993 94. Puthalakath, H. et al. ER Stress Triggers Apoptosis by Activating BH3-Only  
994 Protein Bim. *Cell* 129, 1337–1349 (2007).
- 995 95. Marciniak, S. J. et al. CHOP induces death by promoting protein synthesis and  
996 oxidation in the stressed endoplasmic reticulum. *Genes Dev.* 18, 3066–3077 (2004).
- 997 96. Hetz, C., Zhang, K. & Kaufman, R. J. Mechanisms, regulation and functions of the  
998 unfolded protein response. *Nat. Rev. Mol. Cell Biol.* 21, 421–438 (2020).
- 999 97. Camini, F. C., da Silva Caetano, C. C., Almeida, L. T. & de Brito Magalhães, C. L.  
1000 Implications of oxidative stress on viral pathogenesis. *Arch. Virol.* 162, 907–917 (2017).
- 1001 98. Gong, G., Waris, G., Tanveer, R. & Siddiqui, A. Human hepatitis C virus NS5A  
1002 protein alters intracellular calcium levels, induces oxidative stress, and activates STAT-3  
1003 and NF- $\kappa$ B. *Proc. Natl. Acad. Sci. U. S. A.* 98, 9599–9604 (2001).
- 1004 99. Pahl, H. L. Signal transduction from the endoplasmic reticulum to the cell nucleus.  
1005 *Physiol. Rev.* 79, 683–701 (1999).
- 1006 100. Berridge, M. J., Bootman, M. D. & Lipp, P. Calcium - a life and death signal. *Nature*  
1007 395, 645–648 (1998).
- 1008 101. Tardif, K. D., Waris, G. & Siddiqui, A. Hepatitis C virus, ER stress, and oxidative  
1009 stress. *Trends Microbiol.* 13, 159–163 (2005).
- 1010 102. Li, S. et al. SARS-CoV-2 triggers inflammatory responses and cell death through  
1011 caspase-8 activation. *Signal Transduct. Target. Ther.* 5, (2020).
- 1012 103. Li, G. et al. Transcriptomic signatures and repurposing drugs for COVID-19  
1013 patients: findings of bioinformatics analyses. *Comput. Struct. Biotechnol. J.* 19, 1–15  
1014 (2021).
- 1015 104. Islam, A. B. M. M. K. et al. Transcriptome of nasopharyngeal samples from COVID-  
1016 19 patients and a comparative analysis with other SARS-CoV-2 infection models reveal  
1017 disparate host responses against SARS-CoV-2. *J. Transl. Med.* 19, 1–25 (2021).
- 1018 105. Krishnamoorthy, P., Raj, A. S., Roy, S. & Senthil, N. Comparative transcriptome  
1019 analysis of SARS-CoV, MERS-CoV, and SARS-CoV-2 to identify potential pathways for  
1020 drug repurposing. *Comput. Biol. Med.* 128, (2020).
- 1021 106. Singh, K. et al. Network Analysis and Transcriptome Profiling Identify Autophagic  
1022 and Mitochondrial Dysfunctions in SARS-CoV-2 Infection. *Front. Genet.* 12, 1–19 (2021).
- 1023 107. Balakrishnan, B. & Lai, K. Modulation of SARS-CoV-2 Spike-induced Unfolded  
1024 Protein Response (UPR) in HEK293T cells by selected small chemical molecules.  
1025 *bioRxiv* (2021) doi:10.1101/2021.02.04.429769.
- 1026 108. Köseleler, A., Sabirli, R., Gören, T., Türkçüer, I. & Kurt, Ö. Endoplasmic reticulum  
1027 stress markers in SARS-COV-2 infection and pneumonia: Case-control study. *In Vivo*  
1028 (Brooklyn). 34, 1645–1650 (2020).
- 1029 109. Jin, J. et al. Reticulocalbin 3 deficiency in alveolar epithelium exacerbated  
1030 bleomycin-induced pulmonary fibrosis. *Am. J. Respir. Cell Mol. Biol.* 59, 320–333 (2018).



- 1031 110. Zhang, Q. et al. Rcn3 suppression was responsible for partial relief of emphysema  
1032 as shown by specific type II alveolar epithelial cell Rcn3 CKO mouse model. *Int. J. COPD*  
1033 16, 147–158 (2021).
- 1034 111. Li, G. et al. Role of ERO1- $\alpha$ -mediated stimulation of inositol 1,4,5-triphosphate  
1035 receptor activity in endoplasmic reticulum stress-induced apoptosis. *J. Cell Biol.* 186,  
1036 783–792 (2009).
- 1037 112. Yao, Y. et al. A non-canonical pathway regulates ER stress signaling and blocks  
1038 ER stress-induced apoptosis and heart failure. *Nat. Commun.* 8, (2017).
- 1039 113. Gu, Y. et al. The deubiquitinating enzyme UCHL1 negatively regulates the  
1040 immunosuppressive capacity and survival of multipotent mesenchymal stromal cells  
1041 article. *Cell Death Dis.* 9, (2018).
- 1042 114. Shen, H., Sikorska, M., Leblanc, J., Walker, P. R. & Liu, Q. Y. Oxidative stress  
1043 regulated expression of Ubiquitin Carboxyl-terminal Hydrolase-L1: Role in cell survival.  
1044 *Apoptosis* 11, 1049–1059 (2006).
- 1045 115. Tangri, A. et al. Deubiquitinase UCHL1 Maintains Protein Homeostasis through  
1046 the PSMA7–APEH–Proteasome Axis in High-grade Serous Ovarian Carcinoma. *Mol.*  
1047 *Cancer Res.* 1–15 (2021) doi:10.1158/1541-7786.mcr-20-0883.
